# Supplementary material for: Investigation of Helicobacter pylori infection among symptomatic children in Hangzhou from 2007 to 2014: a retrospective study with 12,796 cases
Source: PeerJ. 2017 Jan 31;5:e2937. doi: 10.7717/peerj.2937 (PMC5289104; doi:10.7717/peerj.2937)
Supplement: Data S1 [file peerj-05-2937-s001.xls]

## Sheet: 2007-2014
No.	Sex	Age(years)	Symptoms									UBT results	History of H. pylori infected family member
			Abdominal pain	Anorexia	Nausea/Vomiting	Abdominal distension	Hiccup	Diarrhea	Constipation	Halitosis	Failure to thrive/Weight loss
07-4472	Male	13Y	Yes	Yes	No	No	No	No	No	No	No	8.29	No
07-4474	Male	3Y11M	Yes	No	No	No	No	No	No	No	No	0.83	No
07-4475	Female	9Y6M	No	No	No	No	No	No	No	No	No	2.88	Yes
07-4476	Male	8Y7M	Yes	Yes	Yes	No	No	No	No	No	Yes	0.55	No
07-4477	Female	8Y5M	Yes	No	No	No	No	No	No	No	No	1.62	No
07-4479	Female	8Y5M	Yes	No	No	No	No	No	Yes	No	No	0.07	No
07-4480	Female	3Y9M	Yes	No	No	Yes	No	No	No	No	No	1.21	Yes
07-4482	Female	4Y11M	Yes	No	No	No	No	No	Yes	No	No	2.18	No
07-4483	Male	4Y5M	Yes	No	No	No	No	No	No	No	No	1.57	Yes
07-4484	Female	6Y3M	No	No	Yes	No	No	No	No	No	No	-0.14	No
07-4486	Female	10y8m	Yes	Yes	No	No	No	Yes	No	No	Yes	0.94	No
07-4487	Female	8Y1M	Yes	No	No	Yes	No	No	No	No	No	0.14	No
07-4488	Male	7Y4M	Yes	No	No	No	No	No	No	No	No	2.78	No
07-4489	Female	10Y4m	Yes	Yes	No	No	No	No	No	No	No	1.69	No
07-4490	Female	9Y2M	Yes	No	No	No	No	No	No	No	No	0.03	No
07-4491	Female	6Y	Yes	No	No	No	No	No	No	No	No	0.58	No
07-4492	Male	4Y2M	Yes	No	No	No	No	No	No	No	No	0.35	No
07-4493	Male	11Y3M	Yes	No	No	No	No	No	No	No	No	-0.3	No
07-4494	Female	6Y	Yes	Yes	No	No	No	No	No	No	No	0.61	No
07-4497	Female	10y11m	Yes	No	No	No	No	No	No	No	No	57.01	No
07-4498	Female	7Y11M	Yes	No	No	Yes	Yes	No	No	No	No	1.99	No
07-4499	Female	5Y6M	Yes	No	No	No	No	No	Yes	No	No	0.73	No
07-4500	Male	9Y6M	Yes	No	No	No	No	No	No	No	No	0.1	No
07-4501	Female	12Y	Yes	Yes	No	No	No	Yes	No	No	No	28.92	No
07-4502	Female	8Y	Yes	Yes	No	No	No	No	No	No	No	8.74	No
07-4503	Female	5Y3M	Yes	No	No	No	No	No	No	No	No	1.13	No
07-4505	Male	7Y	Yes	Yes	No	No	No	No	No	No	No	0.93	No
07-4506	Male	5Y8M	No	No	No	No	No	No	No	No	No	0.42	Yes
07-4507	Male	4Y9M	Yes	No	No	No	No	No	No	No	No	1.86	No
07-4508	Female	6Y9M	Yes	No	No	No	No	No	No	No	No	0.54	No
07-4509	Female	9Y5M	Yes	Yes	No	No	No	No	No	No	No	1.07	No
07-4510	Male	7Y1M	Yes	No	No	No	No	No	No	No	No	6.54	No
07-4511	Male	8Y11M	Yes	Yes	No	No	Yes	No	No	No	No	0.94	No
07-4512	Female	9Y10M	Yes	Yes	No	No	No	No	No	No	No	0.46	No
07-4513	Female	6Y5M	Yes	Yes	No	No	No	No	No	No	No	0.43	Yes
07-4514	Male	3Y2M	Yes	No	No	No	No	Yes	No	No	No	4.84	No
07-4516	Male	12Y6M	Yes	No	No	Yes	No	Yes	No	No	No	1.14	No
07-4517	Female	9Y11M	Yes	No	No	No	No	No	No	No	No	0.97	Yes
07-4518	Female	9Y3M	Yes	No	No	Yes	No	No	No	No	No	0	No
07-4519	Female	10y11m	Yes	No	No	No	No	No	No	No	No	15.63	No
07-4521	Male	8Y4M	Yes	No	No	No	No	Yes	No	No	No	0.59	No
07-4522	Male	3Y2M	Yes	Yes	No	No	No	No	No	No	Yes	1.65	No
07-4523	Female	8Y1M	Yes	No	No	No	No	No	No	No	No	-0.31	No
07-4524	Female	9Y9M	Yes	No	No	No	No	No	No	No	No	11.23	No
07-4525	Female	5Y2M	Yes	Yes	No	No	No	No	No	No	No	19.01	No
07-4526	Male	8Y4M	Yes	No	Yes	No	No	No	No	No	No	0.71	No
07-4527	Female	5Y11M	Yes	Yes	No	No	No	No	No	No	No	0.01	No
07-4528	Female	6Y7M	Yes	No	No	No	No	No	Yes	No	No	0.8	No
07-4529	Male	12Y	Yes	No	Yes	No	No	No	No	No	No	34.82	No
07-4530	Female	12Y11M	Yes	No	No	No	No	No	No	No	No	3.12	No
07-4531	Female	6Y10M	Yes	No	No	Yes	No	No	No	No	No	1.02	No
07-4534	Female	6Y2M	Yes	No	No	Yes	No	No	No	No	No	75.71	No
07-4535	Male	8Y10M	No	Yes	No	No	No	No	No	No	No	1	No
07-4537	Female	5Y9M	No	No	No	No	Yes	No	No	No	No	35.44	No
07-4538	Female	9Y	Yes	No	No	Yes	No	No	No	No	No	0.52	No
07-4539	Male	12Y1M	Yes	No	No	No	No	No	No	No	No	0.95	No
07-4540	Female	9Y10M	Yes	No	No	No	No	Yes	No	No	No	22.66	No
07-4541	Male	6Y2M	Yes	No	No	No	No	No	Yes	No	No	15.21	No
07-4542	Male	5Y1M	Yes	No	No	No	No	No	Yes	No	No	1.12	No
07-4543	Male	4Y6M	No	No	No	No	Yes	No	No	No	No	0.63	No
07-4544	Male	9Y6M	Yes	Yes	No	No	No	No	No	No	No	57.43	No
07-4545	Male	8Y10M	Yes	Yes	No	Yes	No	No	No	No	No	1.61	No
07-4546	Female	9Y11M	Yes	No	Yes	No	No	No	No	No	No	0.42	No
07-4547	Male	7Y3M	Yes	No	No	No	No	No	No	No	No	0.18	No
07-4550	Female	7Y	No	No	Yes	No	No	Yes	No	No	No	1.08	No
07-4553	Male	8Y10M	Yes	No	No	Yes	No	Yes	No	No	No	0.26	No
07-4555	Male	8Y8M	No	No	Yes	No	No	Yes	No	No	No	0.75	No
07-4556	Male	4Y9M	Yes	No	No	No	No	No	No	No	No	0.69	No
07-4560	Male	14Y10M	No	No	Yes	No	No	No	No	No	No	0.23	No
07-4561	Female	5Y5M	Yes	No	Yes	No	No	No	No	No	No	1.76	No
07-4562	Female	7Y6M	Yes	No	No	No	No	No	No	No	No	0.66	No
07-4563	Female	6Y2M	Yes	No	No	No	No	No	No	No	No	0.41	No
07-4564	Male	8Y	Yes	Yes	No	No	No	No	No	No	No	55.32	No
07-4565	Male	6Y10M	Yes	Yes	No	No	No	No	No	No	No	0.58	No
07-4566	Male	3Y1M	No	No	Yes	No	No	No	No	No	No	0.25	No
07-4567	Female	5Y	Yes	No	No	No	No	No	No	No	No	4.71	No
07-4568	Male	9Y2M	Yes	No	Yes	No	No	Yes	No	No	No	0.15	No
07-4569	Male	8Y9M	Yes	No	Yes	No	No	No	No	No	No	0.7	No
07-4570	Female	12Y5M	Yes	No	Yes	No	No	No	No	No	No	0.07	No
07-4571	Male	6Y1M	Yes	No	No	No	No	No	No	No	No	0.49	No
07-4572	Male	6Y10M	Yes	No	No	No	No	No	No	No	No	55.91	No
07-4573	Male	4Y3M	No	No	No	No	No	Yes	No	No	No	0.45	No
07-4577	Female	9Y8M	No	No	No	No	No	No	No	No	No	55.25	Yes
07-4578	Male	6Y5M	No	No	Yes	No	No	No	No	No	No	61.17	No
07-4581	Female	4Y10M	Yes	Yes	No	Yes	No	No	No	No	No	0.73	No
07-4582	Male	10y1m	Yes	No	Yes	Yes	No	No	No	No	No	1.61	No
07-4583	Male	13y7m	No	No	No	Yes	No	No	No	No	No	0.3	No
07-4584	Male	7y3m	Yes	No	No	No	No	No	No	No	No	21.39	No
07-4586	Female	14Y10M	No	No	No	No	No	No	No	No	No	0.96	No
07-4587	Male	5y8m	No	No	Yes	No	No	No	No	No	No	42.89	No
07-4588	Female	5y11m	No	Yes	No	No	No	No	No	Yes	No	7.35	Yes
07-4591	Female	9y6m	Yes	Yes	No	No	No	No	No	No	Yes	0.48	No
07-4592	Female	8y3m	Yes	No	No	No	No	No	No	No	No	8.57	No
07-4593	Female	7y3m	Yes	No	No	No	No	No	No	No	No	15.23	No
07-4594	Female	10y5m	Yes	Yes	No	Yes	No	No	No	No	No	1.05	No
07-4595	Male	4y8m	Yes	No	Yes	No	No	No	No	No	No	1.24	No
07-4596	Male	5y11m	Yes	Yes	No	Yes	No	No	No	No	Yes	0.87	No
07-4597	Male	5y6m	Yes	No	No	No	No	No	No	No	No	0.76	No
07-4599	Female	12y3m	Yes	No	No	Yes	No	No	No	No	No	-0.05	No
07-4603	Male	6y8m	Yes	No	Yes	No	No	No	No	No	No	2.2	No
07-4604	Female	6y7m	Yes	No	Yes	No	No	No	No	No	No	1.45	No
07-4605	Male	5y7m	Yes	Yes	No	Yes	No	No	No	No	No	0.97	No
07-4606	Female	5y3m	No	No	No	No	No	No	No	Yes	No	-0.7	Yes
07-4611	Female	12y8m	Yes	No	No	No	No	No	Yes	No	No	-0.34	No
07-4612	Female	13y3m	Yes	No	No	No	No	No	No	No	No	1	No
07-4613	Female	5y6m	Yes	No	No	No	No	No	No	No	No	1.24	No
07-4614	Male	9y8m	Yes	Yes	Yes	No	No	No	Yes	No	No	-0.96	No
07-4615	Female	5y4m	Yes	No	No	Yes	No	No	No	No	No	-0.03	No
07-4616	Female	12y3m	Yes	No	No	No	No	No	No	No	No	63.61	No
07-4617	Female	6y7m	Yes	No	No	No	No	No	No	No	No	0.76	No
07-4618	Male	12y3m	Yes	No	No	No	No	No	No	No	No	0.13	No
07-4619	Female	6y6m	Yes	No	No	No	No	No	No	No	No	0.73	No
07-4620	Male	4y7m	Yes	No	No	No	No	No	No	No	No	0.03	No
07-4621	Male	3y7m	No	No	No	No	Yes	No	No	Yes	No	1.87	No
07-4622	Male	6y	Yes	No	No	No	No	No	No	No	No	43.58	No
07-4623	Male	5y5m	Yes	Yes	No	No	No	No	No	No	No	0.22	No
07-4624	Male	9y3m	Yes	No	No	No	No	No	No	No	No	0.45	No
07-4625	Male	4y5m	Yes	No	No	No	No	No	No	No	No	0.79	No
07-4626	Male	6y2m	Yes	Yes	No	No	No	No	No	No	Yes	0.86	No
07-4627	Male	12y7m	Yes	No	No	No	No	No	No	No	No	1.89	No
07-4631	Female	9y6m	Yes	No	No	No	No	No	No	No	No	0	No
07-4632	Male	9y1m	Yes	No	No	No	No	No	No	No	No	1.27	No
07-4633	Male	13y10m	Yes	No	No	Yes	Yes	No	No	No	No	0.21	No
07-4639	Female	7y4m	Yes	No	No	No	No	No	No	No	No	1.51	No
07-4642	Female	16y2m	Yes	No	No	No	No	No	No	No	No	-0.46	No
07-4643	Female	9y11m	No	Yes	Yes	No	No	No	Yes	No	No	1.02	No
07-4644	Female	8y5m	Yes	No	No	No	No	No	No	No	No	0.75	No
07-4646	Female	12y8m	Yes	No	No	No	No	Yes	Yes	No	No	0.32	No
07-4647	Female	4y5m	Yes	No	No	No	No	No	No	No	No	0.97	No
07-4648	Female	10y7m	Yes	No	No	No	No	No	No	No	No	0.06	No
07-4649	Male	6y1m	Yes	Yes	No	No	No	No	No	No	No	0.97	No
07-4650	Female	12y5m	No	No	Yes	Yes	No	No	No	No	No	1.57	No
07-4651	Female	6y6m	Yes	No	No	No	No	No	No	No	No	0.4	No
07-4652	Female	8y10m	Yes	No	No	Yes	No	No	No	No	No	-0.43	No
07-4653	Female	7y	Yes	Yes	No	No	No	No	No	No	No	0.71	No
07-4654	Male	6y1m	Yes	No	No	No	No	No	No	No	No	0.12	No
07-4656	Male	5y4m	No	No	Yes	No	No	No	No	No	No	0.49	No
07-4657	Male	5y5m	Yes	No	No	No	No	No	No	No	No	1.23	No
07-4658	Male	8y9m	Yes	No	No	No	No	No	No	No	No	0.69	No
07-4659	Male	4y8m	Yes	No	No	No	No	No	No	No	No	0.71	No
07-4661	Female	7y2m	No	No	Yes	No	No	Yes	No	No	No	30.75	No
07-4663	Male	4y11m	No	No	Yes	No	No	No	No	No	No	2.43	No
07-4664	Female	9y4m	Yes	No	No	No	No	No	No	Yes	No	0.76	No
07-4665	Male	5y1m	Yes	No	No	No	Yes	No	No	No	No	-0.35	No
07-4666	Male	11y9m	No	Yes	No	No	No	No	No	No	No	-0.5	No
07-4669	Female	5y	Yes	No	Yes	No	No	No	No	No	No	1.19	No
07-4670	Female	4y7m	Yes	No	No	No	No	No	No	No	No	1.11	No
07-4671	Female	8y10m	Yes	No	No	No	No	No	No	No	No	1.14	No
07-4672	Female	10y7m	Yes	Yes	No	Yes	No	No	No	No	No	55.32	No
07-4673	Male	4y7m	No	Yes	No	Yes	No	No	No	No	No	38.4	Yes
07-4674	Female	11y11m	Yes	Yes	No	No	No	No	Yes	No	No	1.14	No
07-4676	Female	6y6m	Yes	Yes	No	No	No	No	No	No	No	-6.15	Yes
07-4677	Female	4y11m	Yes	Yes	No	No	No	No	No	No	No	22.32	No
07-4679	Male	7y8m	Yes	No	Yes	No	Yes	No	No	No	No	74.7	No
07-4684	Female	6y10m	Yes	Yes	No	No	No	No	No	No	No	0.23	No
07-4685	Male	8y8m	Yes	No	No	No	No	No	No	No	No	11.31	No
07-4687	Male	7y9m	Yes	Yes	Yes	No	No	No	No	No	No	25.94	No
07-4688	Male	7y1m	Yes	No	No	No	Yes	No	No	No	No	0.89	No
07-4689	Male	12y5m	No	No	No	No	No	No	No	No	No	1.06	No
07-4691	Male	6y7m	Yes	No	No	No	No	No	No	No	No	1.88	No
07-4692	Male	6y6m	Yes	No	No	No	No	No	No	No	No	1.85	No
07-4693	Female	11y6m	Yes	Yes	No	Yes	No	No	Yes	No	No	0.72	No
07-4694	Male	9y1m	Yes	No	No	No	No	No	No	No	No	0.12	Yes
07-4695	Male	6y6m	Yes	No	No	No	No	No	No	No	No	0.66	No
07-4696	Male	4y7m	Yes	No	No	No	No	No	No	No	No	39.98	No
07-4697	Male	6y4m	Yes	No	No	No	No	No	No	No	No	0.87	No
07-4698	Female	7y6m	Yes	No	No	No	No	No	No	No	No	0.95	No
07-4699	Male	10y3m	Yes	No	No	No	No	No	No	No	No	0.99	No
07-4700	Male	3y6m	Yes	Yes	No	No	No	No	No	No	No	0.65	No
07-4701	Male	3y1m	Yes	Yes	No	No	No	No	No	No	No	2.08	No
07-4702	Female	15y2m	Yes	Yes	Yes	No	No	No	No	No	No	15.91	No
07-4703	Female	10y2m	Yes	Yes	No	No	No	No	No	No	No	1.51	No
07-4704	Male	9y2m	Yes	No	No	No	No	No	No	No	No	25.78	No
07-4705	Male	5y3m	Yes	Yes	No	No	No	No	No	No	No	1.02	No
07-4706	Male	4y2m	Yes	No	No	No	No	No	No	No	No	0.61	No
07-4708	Female	5y9m	Yes	No	No	No	No	No	No	No	No	0.35	No
07-4709	Male	8y7m	Yes	Yes	No	Yes	No	No	No	No	No	0.4	Yes
07-4712	Male	5y6m	No	No	Yes	No	No	No	No	No	No	5.85	No
07-4714	Male	9y8m	Yes	Yes	No	No	No	No	No	No	No	1.85	No
07-4717	Female	6y5m	Yes	No	No	No	No	No	Yes	No	No	1.34	No
07-4718	Female	9y7m	No	No	No	No	Yes	No	No	No	No	61.34	No
07-4719	Female	3y5m	Yes	No	No	No	No	No	No	No	No	0.73	No
07-4721	Female	8y2m	Yes	No	No	No	No	No	No	No	No	0.81	No
07-4722	Male	11y10m	Yes	No	No	No	No	No	No	No	No	0.71	No
07-4723	Female	13y6m	Yes	No	No	No	No	No	No	No	No	76.58	No
07-4724	Female	10y5m	No	No	No	No	No	No	No	No	No	26.81	Yes
07-4726	Female	3y	Yes	No	No	No	No	No	No	No	No	0.18	No
07-4727	Male	9y1m	Yes	No	Yes	No	No	No	No	No	No	-0.27	No
07-4728	Female	9y7m	Yes	No	No	No	No	No	No	No	No	1.58	No
07-4730	Female	6y5m	No	Yes	Yes	No	No	No	No	No	No	0.31	No
07-4731	Female	4y9m	Yes	No	No	No	No	No	No	No	No	0.53	Yes
07-4732	Male	13y8m	No	No	Yes	No	No	No	No	No	No	0.88	No
07-4733	Female	5y6m	Yes	No	No	No	No	No	No	No	No	0.45	No
07-4734	Female	4y8m	Yes	Yes	No	No	Yes	No	Yes	No	No	0.52	No
07-4735	Male	5y6m	Yes	No	No	No	No	No	No	No	No	0.69	No
07-4737	Male	6y2m	No	Yes	No	No	Yes	Yes	No	No	No	-0.32	No
07-4738	Male	8y5m	Yes	No	No	Yes	No	No	No	No	No	-2	Yes
07-4739	Male	7y3m	No	Yes	No	No	No	No	No	No	No	2.08	No
07-4742	Male	3y2m	Yes	No	Yes	No	Yes	No	No	No	No	2.38	No
07-4743	Male	6y6m	No	No	Yes	Yes	No	No	No	No	No	1.08	No
07-4744	Male	12y11m	Yes	No	No	No	No	No	No	No	No	-2.12	No
07-4746	Male	12y7m	Yes	No	No	No	No	No	No	No	No	7.63	No
07-4747	Female	12y6m	Yes	No	No	No	No	No	No	No	No	20.9	No
07-4751	Male	8y1m	Yes	Yes	No	No	No	No	No	No	No	2.05	Yes
07-4752	Male	3y3m	Yes	No	Yes	No	No	No	No	No	No	2.11	No
07-4753	Male	9y2m	Yes	No	No	No	No	No	No	No	No	0.2	No
07-4754	Female	3y11m	Yes	No	No	No	No	No	No	No	No	1.61	No
07-4757	Female	10y9m	Yes	No	Yes	No	No	No	No	No	No	0.27	No
07-4759	Female	5y2m	Yes	Yes	Yes	No	No	No	Yes	No	No	0.39	No
07-4761	Female	12y5m	Yes	No	No	No	No	No	No	No	No	44.7	No
07-4762	Male	10y8m	No	No	Yes	No	No	No	No	No	No	-0.14	No
07-4763	Female	6y7m	No	No	Yes	No	No	No	No	No	No	1.35	No
07-4764	Female	3y8m	No	No	Yes	No	No	No	No	No	No	0.65	No
07-4765	Male	4y11m	Yes	No	No	No	No	No	No	No	Yes	0.63	No
07-4766	Male	7y	Yes	No	No	No	No	No	No	No	No	-0.23	No
07-4767	Female	4y3m	Yes	No	No	No	No	No	No	No	No	0.25	No
07-4768	Male	5y5m	Yes	No	No	No	No	No	Yes	No	No	25.5	No
07-4769	Male	7y7m	Yes	No	No	Yes	No	No	No	No	No	0.03	No
07-4770	Male	4y2m	Yes	No	Yes	No	No	No	No	No	No	-0.14	No
07-4772	Male	9y9m	Yes	No	No	Yes	No	No	Yes	No	No	0.57	Yes
07-4774	Female	12y9m	Yes	No	No	No	No	No	No	No	No	1.03	No
07-4776	Female	7y5m	Yes	Yes	No	Yes	No	No	No	No	No	3.08	No
07-4777	Male	6y5m	No	No	No	No	No	Yes	No	Yes	No	-1.18	No
07-4778	Female	5y7m	Yes	No	No	No	No	No	No	No	No	1.35	No
07-4780	Male	10y9m	Yes	No	No	No	No	No	No	No	No	-3.08	No
07-4781	Female	5y8m	Yes	No	No	No	No	No	Yes	No	No	3.28	No
07-4782	Female	6y11m	Yes	Yes	No	No	No	No	No	No	No	-4.7	No
07-4783	Male	11y10m	Yes	No	No	No	No	No	No	No	No	3.43	No
07-4786	Male	6y2m	Yes	No	No	No	No	No	Yes	No	No	1.89	No
07-4788	Female	6y6m	Yes	Yes	No	No	No	No	No	No	No	1.53	No
07-4789	Female	5y6m	Yes	Yes	No	No	No	No	Yes	No	No	2.58	No
07-4791	Male	7y7m	Yes	No	No	No	No	Yes	No	No	No	52.11	No
07-4792	Male	13y3m	Yes	No	No	No	No	No	No	No	No	1.71	No
07-4793	Female	4y4m	Yes	No	No	No	No	No	No	No	No	2.49	No
07-4794	Female	7y8m	Yes	No	No	No	No	No	No	Yes	No	-1.33	No
07-4795	Female	7y	Yes	Yes	No	No	No	No	No	No	No	1.25	No
07-4796	Male	14y2m	Yes	No	No	No	No	No	No	No	No	10.4	No
07-4797	Female	6y3m	Yes	Yes	No	No	No	No	No	No	Yes	1.84	No
07-4798	Male	4y10m	Yes	No	No	No	No	Yes	No	No	No	0.76	No
07-4799	Male	10y7m	Yes	No	No	Yes	Yes	Yes	No	No	No	-0.86	No
07-4800	Female	4y3m	No	No	Yes	No	No	No	No	No	No	1.5	No
07-4801	Female	5y11m	Yes	No	No	No	No	No	No	No	No	-0.12	No
07-4802	Female	11y8m	Yes	No	No	No	No	No	No	No	No	13.03	Yes
07-4803	Male	6y5m	Yes	No	No	No	No	No	No	No	No	11.51	Yes
07-4804	Male	6y8m	Yes	No	Yes	No	No	No	No	No	No	0.68	Yes
07-4806	Female	10y4m	Yes	No	No	Yes	No	Yes	No	No	No	0.96	No
07-4807	Female	6y4m	No	No	No	No	No	No	No	No	Yes	0.34	No
07-4808	Male	5y11m	Yes	Yes	No	Yes	No	No	No	No	No	8.93	No
07-4809	Female	8y8m	Yes	Yes	No	No	No	No	No	No	No	1.08	No
07-4811	Male	10y7m	Yes	Yes	No	Yes	No	No	No	Yes	No	6.75	No
07-4812	Female	12y3m	Yes	No	No	No	No	No	No	No	No	0.2	No
07-4813	Male	8y5m	Yes	No	Yes	No	No	No	No	No	No	0.15	No
07-4815	Female	6y1m	Yes	Yes	No	No	No	No	No	No	No	19.7	No
07-4816	Male	7y5m	No	No	Yes	No	No	No	No	No	No	8.81	No
07-4818	Male	6y5m	Yes	Yes	No	No	No	No	Yes	No	No	3.98	No
07-4820	Female	5y8m	Yes	No	No	No	No	No	No	No	No	1.29	No
07-4821	Female	4y7m	Yes	Yes	No	No	No	No	No	No	No	1.28	No
07-4822	Female	7y11m	Yes	No	No	Yes	No	No	No	No	No	0.89	No
07-4824	Female	7y8m	Yes	No	No	Yes	No	No	No	No	No	3.33	No
07-4825	Male	4y4m	Yes	Yes	No	No	No	No	No	No	No	1.11	No
07-4826	Male	4y4m	Yes	Yes	Yes	No	No	Yes	No	No	No	2.68	No
07-4829	Male	5y6m	No	Yes	Yes	No	No	No	No	Yes	No	2.26	No
07-4830	Male	4y9m	Yes	No	No	No	No	No	No	No	No	63.55	No
07-4831	Female	4y7m	Yes	No	No	No	No	No	No	No	No	1.65	No
07-4832	Male	8y10m	Yes	Yes	No	No	No	No	No	No	No	26.89	No
07-4833	Female	6y2m	Yes	No	No	Yes	No	No	Yes	No	No	1.41	No
07-4834	Male	5y1m	Yes	No	No	Yes	No	No	No	No	No	0.88	No
07-4835	Male	6y8m	No	No	No	No	No	No	No	No	Yes	0.59	No
07-4836	Female	5y7m	Yes	Yes	No	No	No	No	No	No	No	1.17	No
07-4837	Male	8y3m	Yes	No	No	No	No	No	Yes	No	No	1.58	No
07-4838	Female	3y9m	Yes	Yes	No	No	No	No	Yes	No	No	0.57	No
07-4839	Female	12y7m	Yes	No	No	No	No	No	No	No	No	1.63	No
07-4840	Female	6y1m	Yes	No	No	No	No	No	No	No	No	1.79	No
07-4841	Male	5y7m	No	No	No	No	No	No	No	No	No	1.81	No
07-4843	Female	10y5m	Yes	No	No	Yes	No	No	No	No	No	1.48	No
07-4846	Female	6y3m	Yes	Yes	No	No	No	No	Yes	No	No	1.53	No
07-4847	Female	6y10m	Yes	No	Yes	No	No	No	No	No	No	-0.07	No
07-4849	Female	5y3m	Yes	Yes	Yes	No	No	No	No	No	No	0.22	No
07-4852	Female	9y6m	Yes	No	No	Yes	No	No	No	No	No	1.64	No
07-4854	Male	7y5m	Yes	No	Yes	No	No	No	No	Yes	No	0.67	No
07-4857	Male	7y5m	Yes	No	No	No	No	No	No	No	No	1	Yes
07-4858	Female	12y4m	Yes	No	No	No	No	No	No	No	No	-0.03	No
07-4862	Female	10y8m	Yes	Yes	No	Yes	No	No	No	No	No	0.91	No
07-4863	Female	11y4m	Yes	Yes	No	No	No	No	No	No	No	2.87	No
07-4864	Male	10y11m	Yes	Yes	No	No	No	Yes	Yes	No	Yes	0.78	No
07-4866	Female	11y5m	Yes	Yes	No	No	No	No	No	No	Yes	2.28	No
07-4867	Female	9y7m	No	No	Yes	No	No	No	No	Yes	No	-0.06	No
07-4869	Female	15y10m	No	Yes	No	No	No	No	No	No	Yes	56.61	Yes
07-4870	Male	10y10m	Yes	No	Yes	No	No	No	No	No	No	56.83	No
07-4871	Male	8y3m	Yes	No	No	No	No	No	No	No	No	56.79	No
07-4872	Male	11y6m	Yes	No	No	Yes	No	Yes	No	No	No	1.03	No
07-4873	Female	8y9m	Yes	No	No	No	No	No	No	No	No	1.32	No
07-4874	Female	4y7m	Yes	Yes	Yes	No	No	No	No	No	No	3.49	No
07-4875	Female	4y6m	Yes	Yes	No	No	No	No	No	No	No	1.96	No
07-4876	Male	7y6m	Yes	No	Yes	No	No	No	No	No	No	8.78	No
07-4877	Male	6y6m	No	Yes	No	No	No	No	No	No	Yes	0.66	No
07-4878	Male	9y4m	Yes	Yes	No	No	No	No	No	No	No	1.21	No
07-4879	Male	9y4m	Yes	No	No	No	No	No	No	No	No	0.23	No
07-4880	Female	10y10m	Yes	No	No	No	No	No	No	No	Yes	0.46	No
07-4881	Female	4y10m	Yes	No	No	No	No	No	No	No	Yes	16.1	No
07-4883	Female	10y7m	Yes	Yes	Yes	No	No	No	No	No	No	0.88	No
07-4884	Female	6y8m	Yes	Yes	No	No	No	No	Yes	No	No	1.41	No
07-4885	Female	6y2m	Yes	No	No	No	No	No	No	No	No	-0.27	No
07-4888	Male	13y1m	Yes	Yes	No	Yes	No	No	Yes	No	No	0.27	No
07-4889	Male	7y1m	Yes	No	No	Yes	No	No	Yes	No	No	2.29	No
07-4890	Male	14y1m	No	No	Yes	Yes	No	No	No	No	No	15.47	No
07-4891	Male	11y9m	Yes	Yes	No	Yes	No	No	No	No	No	2.78	No
07-4892	Female	5y4m	Yes	No	Yes	No	No	No	No	No	No	1.66	No
07-4893	Male	5y11m	Yes	Yes	No	No	No	No	Yes	No	No	0.57	No
07-4894	Female	8y4m	Yes	No	No	No	No	No	No	No	No	19.85	No
07-4895	Male	10y10m	Yes	Yes	No	No	No	Yes	No	No	Yes	40.25	No
07-4896	Female	12y6m	Yes	Yes	No	Yes	No	No	No	No	No	0.96	No
07-4899	Female	9y5m	Yes	Yes	No	Yes	No	No	Yes	No	No	0.5	No
07-4901	Male	10y1m	Yes	Yes	Yes	Yes	No	No	Yes	No	No	0.92	Yes
07-4902	Male	13y9m	No	Yes	No	No	Yes	No	No	No	Yes	1.29	No
07-4904	Female	3y1m	No	Yes	No	No	No	No	No	No	No	26.93	No
07-4906	Male	8y	Yes	No	No	Yes	No	No	Yes	No	No	0.81	No
07-4908	Female	6y6m	Yes	No	No	No	No	No	No	No	No	0.51	No
07-4909	Male	8y1m	Yes	Yes	No	No	No	No	No	No	No	0.27	No
07-4910	Female	9y8m	Yes	No	No	No	No	No	No	No	No	1.19	No
07-4911	Male	10y4m	Yes	No	No	No	No	No	No	No	Yes	5.16	No
07-4912	Male	8y4m	Yes	Yes	No	No	No	No	No	No	No	37.4	No
07-4914	Male	11y3m	Yes	No	No	No	No	No	No	No	No	25.49	No
07-4915	Male	7y3m	Yes	Yes	No	No	No	No	Yes	No	No	46.43	No
07-4916	Male	10y2m	Yes	No	Yes	No	No	No	No	No	No	0.35	No
07-4917	Male	7y5m	Yes	No	No	No	No	No	No	No	No	39.27	No
07-4918	Female	14y6m	Yes	No	No	No	No	No	Yes	No	No	0.53	No
07-4919	Female	6y8m	No	Yes	No	No	No	No	No	No	No	1.56	No
07-4920	Female	7y9m	Yes	No	No	Yes	No	No	No	No	Yes	0.74	No
07-4923	Female	8y4m	Yes	No	No	No	No	No	Yes	No	No	0.29	No
07-4924	Male	4y5m	No	No	Yes	No	No	No	No	No	No	0.59	No
07-4925	Male	4y	Yes	Yes	No	Yes	No	No	Yes	No	No	0.72	No
07-4926	Female	4y3m	Yes	Yes	No	No	No	No	No	No	No	43.56	No
07-4929	Female	7y2m	Yes	Yes	No	No	No	No	Yes	No	No	1.72	No
07-4930	Male	9y3m	Yes	Yes	Yes	No	No	Yes	No	No	No	1.59	No
07-4931	Male	14y7m	No	Yes	No	Yes	Yes	No	No	No	No	1.22	No
07-4932	Male	12y10m	Yes	Yes	No	No	No	No	No	No	No	0.51	No
07-4934	Male	11y4m	Yes	Yes	No	No	No	No	No	No	Yes	1.02	No
07-4935	Female	4y7m	Yes	Yes	No	No	No	No	Yes	No	No	0.53	No
07-4939	Female	8y10m	Yes	Yes	No	No	No	No	No	No	No	32.5	No
07-4940	Male	4y6m	Yes	Yes	No	No	No	No	No	No	No	0.05	No
07-4941	Male	7y5m	Yes	Yes	Yes	No	No	No	No	No	No	37.2	No
07-4942	Male	8y10m	Yes	No	No	No	No	No	No	No	No	1.42	No
07-4943	Female	5y9m	Yes	No	No	No	No	No	Yes	No	No	1.16	No
07-4944	Male	6y2m	No	No	Yes	No	No	No	Yes	No	No	2.39	No
07-4945	Female	6y7m	Yes	No	No	No	No	No	No	No	No	1.39	No
07-4946	Female	8y	Yes	Yes	No	Yes	No	Yes	No	No	No	0.06	No
07-4947	Female	5y8m	Yes	No	No	No	No	No	No	No	No	1.17	No
07-4950	Female	9y1m	Yes	Yes	No	No	No	No	No	No	No	0.19	No
07-4951	Female	13y5m	Yes	No	No	No	No	Yes	No	No	No	1.81	No
07-4952	Female	4y8m	Yes	No	No	No	No	No	No	No	No	0.06	No
07-4954	Male	7y7m	Yes	No	No	No	No	No	No	No	No	1.04	No
07-4956	Male	10y4m	Yes	Yes	No	No	No	No	No	No	No	-0.08	No
07-4961	Male	11y	Yes	No	No	No	No	No	No	No	No	18.12	No
07-4963	Female	3y11m	No	Yes	No	No	Yes	No	No	No	No	7.48	No
07-4965	Male	8y7m	No	No	Yes	No	No	No	No	No	No	0.69	No
07-4966	Female	4y5m	Yes	No	No	No	No	No	No	Yes	No	1.77	No
07-4967	Male	14y6m	No	Yes	Yes	No	No	No	No	No	No	0.32	No
07-4968	Female	11y5m	Yes	No	No	No	No	No	Yes	No	No	1.21	No
07-4969	Male	7y11m	Yes	No	No	No	No	No	No	No	No	0.65	No
07-4971	Female	9y8m	Yes	No	Yes	No	No	No	No	No	No	4.67	No
07-4974	Female	9y6m	Yes	No	No	No	No	No	Yes	No	No	0.88	No
07-4975	Female	8y9m	No	Yes	No	Yes	No	No	No	No	No	0.84	No
07-4976	Male	7y4m	Yes	Yes	No	No	No	No	No	No	No	40.17	No
07-4979	Male	10y6m	Yes	Yes	No	No	No	No	No	No	Yes	0.99	No
07-4980	Female	12y1m	Yes	Yes	Yes	No	No	No	No	No	No	1.49	No
07-4983	Male	8y4m	Yes	No	No	Yes	No	No	Yes	No	No	52.16	No
07-4984	Male	12y9m	No	Yes	No	No	No	No	No	No	No	18.45	Yes
07-4985	Female	11y5m	Yes	No	No	No	No	No	No	No	No	1.18	No
07-4986	Female	7y7m	Yes	Yes	No	No	No	No	No	No	Yes	4.02	No
07-4987	Male	10y11m	No	No	No	No	Yes	No	No	No	No	22.6	No
07-4988	Female	12y5m	Yes	Yes	No	No	No	No	No	No	No	1.41	No
07-4989	Female	9y6m	No	Yes	No	Yes	No	No	No	No	No	1.49	No
07-4990	Male	3y	Yes	Yes	Yes	No	No	No	No	No	No	33.49	No
07-4991	Female	12y8m	Yes	No	No	Yes	No	No	Yes	No	No	-0.43	No
07-4992	Female	7y	Yes	No	No	No	No	No	No	No	No	0.45	No
07-4995	Female	5y8m	Yes	No	No	Yes	No	No	No	No	No	0.5	No
07-4996	Male	6y7m	Yes	Yes	No	No	No	No	No	No	No	1.41	No
07-4997	Male	5y8m	Yes	No	No	Yes	No	No	No	No	No	0.63	No
07-4999	Male	7y1m	Yes	No	No	No	No	No	No	Yes	No	1.2	No
07-5002	Male	11y11m	Yes	Yes	No	Yes	No	Yes	No	No	No	21.06	No
07-5003	Male	11y5m	No	No	No	Yes	No	No	No	No	No	0.79	No
07-5004	Female	11y11m	Yes	No	Yes	Yes	No	No	No	No	No	31.31	No
07-5005	Female	7y8m	Yes	No	No	No	No	No	No	No	No	0.32	No
07-5008	Male	6y5m	Yes	No	No	Yes	No	No	No	Yes	No	0.21	No
07-5009	Female	12y8m	Yes	Yes	No	No	No	No	No	No	No	-0.09	No
07-5010	Male	7y5m	Yes	No	No	No	No	No	Yes	No	Yes	1.09	No
07-5011	Female	8y8m	Yes	Yes	No	No	No	No	No	Yes	No	0.7	No
07-5012	Female	7y3m	Yes	No	No	No	No	No	No	No	No	0.17	No
07-5013	Male	11y5m	Yes	No	No	No	No	No	Yes	No	No	0.28	No
07-5014	Male	8y6m	Yes	Yes	No	No	No	No	No	No	No	1.22	No
07-5015	Female	8y2m	Yes	No	Yes	Yes	No	No	No	No	No	21.73	No
07-5016	Male	7y6m	Yes	Yes	No	No	No	No	No	No	No	0.35	No
07-5017	Female	5y7m	Yes	Yes	No	No	No	No	No	No	No	0.9	No
07-5018	Male	5y11m	Yes	Yes	No	No	No	No	Yes	No	No	2.62	No
07-5019	Female	9y6m	Yes	No	No	No	No	No	No	No	No	0.53	No
07-5020	Male	12y5m	Yes	No	No	Yes	No	No	No	No	No	7.13	No
07-5022	Male	6y6m	Yes	Yes	No	Yes	No	No	No	No	No	0.7	No
07-5023	Female	5y8m	Yes	Yes	No	No	Yes	No	No	No	No	1.71	No
07-5024	Male	6y2m	Yes	Yes	No	Yes	No	No	Yes	No	No	0.44	No
07-5027	Female	9y11m	Yes	Yes	No	Yes	No	No	No	No	No	0.71	No
07-5029	Female	6y3m	Yes	No	No	No	No	No	No	No	No	1.29	No
07-5030	Female	6y7m	Yes	Yes	No	No	No	Yes	No	No	No	0.96	No
07-5031	Male	5y6m	Yes	No	Yes	No	No	No	No	No	No	2.55	No
07-5034	Female	11y7m	Yes	No	No	No	No	No	No	No	No	0.65	No
07-5035	Female	9y7m	Yes	Yes	No	No	No	No	Yes	No	No	-0.02	No
07-5036	Female	9y1m	Yes	Yes	Yes	No	No	No	No	No	No	34.98	No
07-5037	Female	13y1m	Yes	Yes	No	No	No	Yes	No	No	No	1.28	No
07-5038	Male	10y1m	Yes	Yes	No	No	No	No	No	No	No	0.71	No
07-5040	Female	11y8m	Yes	No	No	Yes	No	No	No	No	No	0.79	No
07-5044	Male	6y7m	Yes	No	No	No	No	No	No	No	No	-0.12	No
07-5045	Female	5y1m	No	No	Yes	No	No	No	Yes	No	No	1.64	No
07-5046	Male	9y9m	Yes	Yes	No	No	No	No	No	No	No	0.77	No
07-5047	Female	5y11m	Yes	Yes	Yes	No	No	No	No	No	Yes	0.94	No
07-5048	Female	5y10m	Yes	Yes	No	No	No	No	No	No	Yes	0.67	No
07-5050	Male	10y11m	Yes	Yes	No	No	No	Yes	No	No	No	0.15	No
07-5051	Female	4y3m	Yes	Yes	No	No	No	No	Yes	No	No	0.11	No
07-5052	Female	9y8m	Yes	No	No	No	No	Yes	No	No	No	1.6	No
07-5056	Male	11y6m	Yes	Yes	No	No	No	No	No	No	No	1.01	No
07-5057	Female	11y2m	Yes	No	No	No	No	No	No	No	No	34.3	Yes
07-5058	Female	5y9m	Yes	No	No	Yes	No	No	No	No	No	0.67	No
07-5059	Female	9y2m	Yes	Yes	No	No	No	No	No	No	No	0.58	No
07-5060	Female	5y2m	Yes	Yes	No	No	No	No	Yes	No	No	0.13	No
07-5061	Male	8y10m	Yes	No	No	Yes	No	No	No	No	No	0.69	No
07-5062	Male	10y4m	Yes	No	No	No	No	No	No	No	No	0.37	No
07-5063	Female	7y4m	Yes	No	No	No	No	No	No	No	Yes	12.49	No
07-5065	Male	14y5m	Yes	No	No	No	No	Yes	No	No	No	0.76	No
07-5066	Male	8y5m	Yes	No	No	Yes	No	No	No	No	No	6.02	No
07-5067	Male	4y3m	Yes	Yes	No	No	No	No	Yes	No	No	38.9	No
07-5068	Male	4y3m	Yes	Yes	No	Yes	No	No	Yes	No	No	-3.38	Yes
07-5069	Female	7y1m	Yes	No	Yes	No	No	No	No	No	No	81.31	No
07-5070	Female	8y11m	Yes	Yes	No	No	No	No	No	No	No	62.15	No
07-5071	Male	6y11m	Yes	Yes	Yes	No	No	No	No	No	No	4	No
07-5072	Female	7y6m	Yes	No	No	Yes	No	No	No	No	No	2.79	No
07-5073	Female	6y9m	Yes	Yes	Yes	No	No	No	No	No	No	2.7	No
07-5074	Male	13y6m	Yes	Yes	No	Yes	No	No	Yes	No	No	4.52	No
07-5076	Male	6y8m	Yes	No	No	No	No	No	No	No	No	3.29	No
07-5077	Female	4y9m	Yes	No	No	No	No	No	No	No	No	91.78	Yes
07-5080	Female	10y7m	Yes	No	No	No	No	No	No	No	No	0.43	No
07-5081	Male	5y2m	Yes	No	No	No	No	No	No	No	No	20.59	No
07-5082	Female	6y7m	Yes	No	No	No	No	No	No	No	No	1	No
07-5083	Male	5y3m	Yes	No	No	No	No	No	No	No	No	1.1	No
07-5084	Female	6y6m	Yes	No	No	No	No	No	No	No	No	1.85	No
07-5087	Male	8y10m	Yes	Yes	No	No	No	No	No	Yes	No	1.6	No
07-5089	Female	8y5m	Yes	No	No	No	No	No	No	No	No	2.13	No
07-5090	Male	3y1m	Yes	Yes	Yes	No	No	No	No	No	No	6.25	Yes
07-5091	Female	5y2m	Yes	No	Yes	No	No	No	No	No	No	22.77	No
07-5093	Male	4y11m	Yes	Yes	No	Yes	No	No	No	No	No	2.14	No
07-5095	Male	8y2m	Yes	No	No	No	No	No	No	No	No	-6.33	No
07-5098	Female	4y7m	Yes	No	No	No	No	No	No	No	No	51.93	No
07-5099	Female	9y9m	Yes	No	No	No	No	No	No	No	No	0.13	No
07-5100	Male	4y7m	Yes	No	No	No	No	No	Yes	No	No	1.29	No
07-5102	Female	7y2m	Yes	No	No	No	No	No	Yes	No	No	0.79	No
07-5103	Male	10y10m	Yes	No	No	Yes	No	No	Yes	No	No	-0.36	No
07-5105	Male	9y2m	No	No	Yes	No	No	No	No	No	No	62.45	No
07-5106	Male	10y4m	Yes	No	Yes	No	No	No	No	No	No	0.22	Yes
07-5107	Female	10y11m	Yes	Yes	Yes	No	No	Yes	No	No	No	0.19	No
07-5109	Female	9y	Yes	No	No	Yes	No	No	No	No	No	46.15	No
07-5110	Female	11y	Yes	No	No	Yes	No	No	No	No	Yes	0.85	No
07-5112	Male	6y3m	No	No	Yes	Yes	No	No	No	No	No	0.49	No
07-5113	Male	6y7m	Yes	Yes	No	No	No	No	Yes	No	Yes	0.86	No
07-5114	Female	5y7m	Yes	Yes	No	No	No	No	No	No	No	0.97	No
07-5115	Male	7y2m	Yes	Yes	No	No	No	No	No	No	Yes	42.4	No
07-5117	Female	12y4m	Yes	No	No	No	No	No	Yes	No	No	34.91	No
07-5118	Female	13y7m	Yes	No	No	No	No	No	No	No	No	1.19	No
07-5119	Female	13y	No	No	No	No	No	No	No	Yes	No	1.1	No
07-5120	Female	9y11m	Yes	Yes	No	Yes	No	No	No	No	No	0.29	No
07-5121	Male	14y5m	Yes	No	No	No	No	No	No	No	No	8.3	No
07-5123	Male	6y2m	Yes	No	No	No	No	No	Yes	No	No	0.53	No
07-5124	Female	8y2m	Yes	No	No	No	No	No	No	No	No	0.15	No
07-5125	Male	4y5m	Yes	No	No	No	No	No	No	Yes	No	0.56	No
07-5126	Female	7y10m	Yes	No	No	Yes	No	No	No	No	No	70.41	No
07-5127	Male	7y7m	Yes	Yes	No	Yes	No	No	Yes	No	No	14.29	No
07-5128	Female	10y5m	Yes	Yes	No	No	No	No	No	No	No	-0.44	No
07-5129	Female	9y	No	No	No	No	No	No	Yes	No	No	0.96	No
07-5130	Male	9y3m	Yes	Yes	Yes	Yes	No	No	Yes	No	No	1.06	No
07-5131	Female	9y5m	Yes	No	No	No	No	No	No	No	No	-0.06	No
07-5135	Female	13y5m	Yes	No	No	Yes	No	No	No	No	No	-5.51	No
07-5137	Male	10y5m	Yes	Yes	No	No	No	Yes	No	No	No	20.94	No
07-5138	Male	13y9m	No	Yes	Yes	Yes	No	No	No	No	No	32.25	No
07-5139	Male	8y1m	No	Yes	Yes	No	No	No	No	No	No	-2.56	No
07-5140	Male	10y10m	No	Yes	No	No	No	No	No	No	No	8.48	No
07-5141	Female	7y3m	Yes	No	No	Yes	No	No	No	No	No	28.68	No
07-5142	Male	10y8m	No	No	Yes	Yes	No	Yes	No	No	No	10.13	No
07-5147	Female	13y4m	Yes	No	No	Yes	No	No	Yes	Yes	No	0.02	No
07-5149	Female	8y9m	Yes	No	No	No	No	Yes	No	No	No	0.66	No
07-5151	Male	9y7m	Yes	No	No	No	No	No	No	No	No	0.92	No
07-5153	Female	6y6m	Yes	No	No	No	No	No	No	No	No	0.54	Yes
07-5154	Male	4y10m	No	Yes	No	Yes	No	No	No	No	No	1.17	No
07-5155	Male	8y10m	Yes	No	No	Yes	No	No	Yes	No	No	-0.41	No
07-5156	Male	11y11m	Yes	Yes	Yes	No	No	No	No	No	No	2.4	No
07-5157	Female	6y7m	Yes	Yes	No	No	No	No	No	No	No	0.74	No
07-5158	Female	9y10m	Yes	No	No	No	Yes	No	No	No	No	80.86	No
07-5161	Male	8y2m	No	Yes	No	Yes	Yes	No	Yes	No	No	19.21	No
07-5162	Female	9y8m	Yes	No	No	No	No	No	No	No	No	0.65	No
07-5164	Female	7y10m	Yes	Yes	No	No	No	No	No	No	No	0.25	No
07-5166	Female	11y6m	Yes	No	No	No	No	No	No	No	No	5.68	No
07-5167	Female	6y3m	Yes	No	No	No	No	No	No	No	No	4.15	No
07-5168	Female	6y10m	Yes	Yes	No	Yes	No	No	No	No	No	0.2	No
07-5169	Male	13y3m	Yes	Yes	Yes	No	No	No	No	No	Yes	-9.69	No
07-5170	Male	12y10m	Yes	Yes	No	No	No	No	No	No	No	3.81	No
07-5171	Male	10y11m	No	No	Yes	No	No	No	No	No	No	46.21	No
07-5172	Female	3y9m	No	No	Yes	No	No	No	No	No	No	49.87	No
07-5173	Male	10y9m	Yes	Yes	No	Yes	No	Yes	No	No	No	-0.43	No
07-5175	Male	10y11m	No	Yes	Yes	No	No	No	No	No	No	16.8	No
07-5176	Male	14y2m	No	No	Yes	No	No	No	No	No	No	-0.24	No
07-5180	Male	4y6m	Yes	No	No	Yes	No	No	No	No	No	1.22	No
07-5182	Male	13y9m	Yes	No	No	No	No	No	No	No	No	0.82	No
07-5184	Female	8y	Yes	Yes	No	No	No	No	No	No	No	1.45	No
07-5185	Male	12y7m	No	No	Yes	Yes	Yes	No	No	No	No	0.24	No
07-5186	Male	6y3m	Yes	No	No	No	No	No	No	No	No	0.38	No
07-5187	Male	10y2m	No	Yes	No	No	No	No	No	No	Yes	43.21	No
07-5191	Male	11y8m	Yes	Yes	No	No	No	No	Yes	No	No	0.57	No
07-5194	Male	5y3m	No	No	No	Yes	No	Yes	Yes	No	Yes	0.78	No
07-5195	Male	9y6m	Yes	No	No	No	No	No	No	No	No	35.13	No
07-5198	Female	7y6m	Yes	No	No	No	No	No	No	No	No	0.93	No
07-5199	Male	4y6m	No	No	No	No	No	No	No	No	No	1.19	No
07-5200	Female	12y6m	Yes	No	No	Yes	No	No	Yes	No	No	0.88	No
07-5204	Female	7y7m	No	No	No	No	No	No	No	No	No	0.37	Yes
07-5206	Male	7y4m	Yes	Yes	No	No	No	No	No	No	No	-0.33	No
07-5207	Male	12y	Yes	Yes	No	No	No	No	No	No	No	1.02	No
07-5208	Female	9y	Yes	No	Yes	Yes	No	No	Yes	No	Yes	0.77	No
07-5209	Male	7y2m	Yes	No	No	No	No	No	No	Yes	No	28.47	Yes
07-5210	Female	7y11m	Yes	No	No	No	No	No	No	No	No	2.09	No
07-5212	Male	8y10m	Yes	No	Yes	No	No	No	No	No	No	1.71	No
07-5213	Female	12y1m	Yes	No	No	Yes	No	No	Yes	No	No	1.72	No
07-5215	Male	10y11m	No	Yes	Yes	No	No	No	Yes	No	No	-0.1	No
07-5216	Male	6y5m	Yes	Yes	No	No	Yes	No	Yes	No	No	3.87	No
07-5217	Male	8y7m	Yes	Yes	Yes	Yes	No	No	No	No	Yes	0.21	No
07-5219	Female	6y9m	Yes	No	No	Yes	No	No	No	No	No	0.58	No
07-5220	Female	3y5m	Yes	No	No	No	No	No	No	No	No	0.67	No
07-5221	Male	10y7m	Yes	No	Yes	No	No	No	No	No	No	16.21	No
07-5222	Male	6y10m	Yes	No	No	No	Yes	No	No	No	No	-0.31	Yes
07-5227	Female	8y1m	Yes	No	No	Yes	No	No	No	No	No	0.97	No
07-5228	Female	9y6m	Yes	Yes	No	No	No	No	No	No	Yes	1.61	No
07-5234	Male	5y4m	Yes	Yes	No	Yes	No	No	Yes	Yes	No	1.02	No
07-5238	Female	7y11m	Yes	Yes	No	Yes	No	No	No	No	Yes	0.69	No
07-5240	Female	9y4m	Yes	Yes	No	Yes	No	No	No	Yes	No	0.88	No
07-5241	Male	3y9m	Yes	Yes	Yes	No	No	No	No	No	No	1.93	No
07-5242	Male	5y8m	Yes	No	No	No	No	Yes	No	No	No	-10.81	No
07-5248	Male	10y1m	Yes	Yes	No	Yes	No	Yes	No	No	Yes	1.34	No
07-5250	Female	6y	Yes	Yes	No	No	No	Yes	Yes	No	No	31.36	No
07-5251	Female	8y11m	Yes	No	No	No	No	No	No	No	No	-0.11	No
07-5252	Male	8y2m	Yes	No	No	No	No	No	No	No	No	0.22	No
07-5255	Male	5y5m	Yes	No	No	No	No	No	No	No	No	0.85	No
07-5256	Female	8y1m	Yes	No	No	No	No	No	Yes	No	No	1.41	No
07-5258	Male	5y9m	Yes	No	No	No	No	No	No	No	No	0.89	No
07-5259	Female	9y	Yes	Yes	No	Yes	No	Yes	No	No	Yes	0.85	No
07-5260	Male	9y8m	Yes	Yes	Yes	No	No	No	No	No	No	0.67	No
07-5263	Male	9y4m	Yes	Yes	Yes	No	No	No	No	Yes	No	0.93	No
07-5265	Male	8y8m	Yes	No	No	No	No	No	No	No	No	1.4	No
07-5266	Male	6y10m	Yes	No	No	No	No	Yes	No	No	No	1.01	No
07-5268	Female	10y	Yes	No	No	No	No	No	No	No	No	0.16	No
07-5269	Male	6y10m	Yes	No	Yes	No	No	No	No	No	No	0.71	No
07-5270	Male	5y11m	Yes	Yes	No	No	No	No	No	No	Yes	0.37	No
07-5271	Female	7y5m	Yes	Yes	No	No	No	Yes	No	No	Yes	0.34	No
07-5273	Female	6y1m	Yes	No	No	No	No	Yes	No	No	No	-0.41	No
07-5274	Male	4y2m	Yes	Yes	No	No	No	No	No	No	No	1.29	No
07-5275	Female	5y7m	Yes	No	No	No	No	No	No	No	No	0.87	No
07-5276	Male	8y9m	Yes	No	Yes	Yes	No	No	Yes	No	No	0.75	No
07-5277	Female	6y11m	No	No	No	No	No	No	No	No	No	0.01	No
07-5278	Male	6y11m	Yes	Yes	No	No	No	No	Yes	No	No	0.14	No
07-5279	Male	6y11m	Yes	No	No	No	Yes	No	No	No	No	0.32	No
07-5280	Male	9y7m	Yes	No	No	Yes	No	No	No	Yes	Yes	58.65	No
07-5281	Male	7y4m	Yes	Yes	No	No	No	No	No	No	No	14.21	No
07-5282	Male	8y4m	Yes	No	No	Yes	No	No	Yes	No	No	15.84	No
07-5284	Female	8y3m	Yes	Yes	No	No	No	No	No	No	No	0.09	No
07-5286	Female	12y4m	Yes	No	No	No	No	No	No	No	Yes	0.08	No
07-5287	Male	8y5m	Yes	No	No	Yes	Yes	No	Yes	No	No	0.83	No
07-5288	Male	6y1m	No	Yes	No	No	No	No	No	No	Yes	1.42	No
07-5290	Female	7y6m	Yes	Yes	No	No	No	No	Yes	No	No	1.16	No
07-5291	Male	8y7m	Yes	No	No	Yes	No	No	Yes	No	No	1.85	No
07-5293	Male	10y6m	Yes	Yes	No	Yes	No	Yes	No	No	No	-0.45	No
07-5294	Male	4y2m	Yes	Yes	No	No	No	No	No	No	No	0.86	No
07-5298	Female	3y5m	Yes	No	No	No	No	No	No	No	No	1.12	No
07-5299	Male	10y8m	Yes	Yes	Yes	No	No	No	No	No	No	1.17	No
07-5300	Male	5y11m	Yes	Yes	Yes	No	No	No	No	No	No	0.93	No
07-5301	Male	8y6m	No	No	Yes	No	No	No	No	No	No	26.96	No
07-5302	Male	5y7m	Yes	No	No	No	No	No	No	No	No	1.09	No
07-5305	Male	9y7m	Yes	No	Yes	No	No	No	No	No	No	10.11	No
07-5306	Male	6y3m	No	Yes	Yes	No	No	No	No	No	No	0.73	No
07-5307	Male	8y10m	No	No	Yes	No	No	No	No	No	No	2.03	No
07-5308	Female	7y10m	Yes	No	No	No	No	No	No	No	No	0.42	No
07-5309	Female	3y1m	No	No	No	No	No	No	No	No	No	0.89	No
07-5310	Female	6y6m	Yes	No	No	No	No	No	Yes	No	No	0.56	No
07-5311	Female	11y11m	Yes	Yes	No	No	No	No	No	No	No	54.76	No
07-5312	Male	5y10m	Yes	No	No	No	No	No	No	No	No	0.63	No
07-5313	Female	11y5m	Yes	No	Yes	Yes	No	No	No	No	No	0.89	No
07-5314	Male	6y9m	Yes	Yes	No	No	No	No	No	No	No	0.91	No
07-5316	Male	3y9m	Yes	No	Yes	No	No	No	No	No	No	1.49	No
07-5317	Female	6y3m	Yes	Yes	No	No	No	No	No	No	No	0.35	No
07-5319	Female	7y3m	No	No	No	No	No	No	No	Yes	No	0.75	No
07-5320	Male	5y6m	No	No	Yes	Yes	No	No	No	No	No	0.02	No
07-5322	Male	8y1m	Yes	No	No	No	No	No	No	No	No	0.13	No
07-5323	Female	11y11m	Yes	Yes	Yes	No	No	No	No	No	No	26.01	No
07-5329	Male	5y3m	No	No	Yes	No	No	No	No	No	No	1.04	No
07-5330	Female	14y6m	No	No	No	Yes	No	No	No	No	No	46	No
07-5331	Female	6y9m	Yes	No	No	No	No	No	No	No	No	0.51	No
07-5332	Female	14y2m	Yes	No	No	No	No	No	No	No	No	-0.96	No
07-5333	Male	9y5m	Yes	No	No	No	No	No	No	No	No	-0.42	No
07-5335	Female	5y10m	Yes	No	No	No	No	No	No	No	No	1.47	Yes
07-5336	Female	4y5m	No	No	Yes	No	No	No	No	No	No	17.45	No
07-5337	Male	8y11m	Yes	No	No	No	No	No	No	No	No	0.02	No
07-5339	Female	7y3m	Yes	No	No	Yes	No	No	No	No	No	0.1	Yes
07-5340	Female	4y10m	Yes	No	No	No	No	No	No	No	No	0.95	No
07-5342	Male	5y	No	No	Yes	No	No	No	No	No	No	0.48	No
07-5343	Male	8y11m	No	Yes	Yes	No	No	No	No	No	No	18.06	No
07-5344	Male	8y5m	Yes	No	No	No	No	Yes	No	No	No	0.36	No
07-5345	Female	11y1m	Yes	Yes	Yes	No	No	No	No	No	Yes	0.3	No
07-5346	Male	5y8m	No	Yes	Yes	No	No	No	No	No	No	1.11	No
07-5347	Male	9y	Yes	No	Yes	No	No	No	No	No	No	0.86	No
07-5348	Female	14y8m	No	No	Yes	No	Yes	No	Yes	No	No	-0.16	No
07-5349	Female	4y7m	Yes	No	No	No	No	No	No	No	No	120.75	No
07-5350	Female	7y3m	No	Yes	No	No	No	No	No	No	No	3.08	No
07-5351	Female	6y8m	Yes	Yes	No	No	No	No	No	No	No	35.11	No
07-5352	Male	4y8m	Yes	Yes	No	Yes	No	No	No	No	No	0.66	No
07-5353	Female	7y3m	Yes	Yes	No	No	No	No	No	No	Yes	1.99	No
07-5354	Male	12y	Yes	Yes	No	No	No	Yes	No	No	Yes	0.96	No
07-5355	Male	9y3m	Yes	No	No	No	Yes	No	No	No	No	1.41	No
07-5356	Female	4y10m	Yes	Yes	No	No	No	No	No	No	No	0.94	No
07-5358	Male	7y5m	Yes	No	No	No	No	No	No	No	No	0.59	No
07-5359	Male	4y8m	Yes	Yes	Yes	No	No	No	No	No	No	1.61	No
07-5360	Male	7y9m	Yes	Yes	No	Yes	No	Yes	No	No	Yes	0.53	No
07-5361	Male	12y7m	Yes	Yes	No	Yes	Yes	No	No	No	No	-0.01	No
07-5362	Female	11y7m	No	No	No	No	No	No	No	No	No	1.01	Yes
07-5364	Female	8y3m	Yes	No	No	Yes	No	No	No	No	No	0.55	No
07-5365	Female	13y1m	No	Yes	Yes	Yes	No	No	No	No	Yes	96.92	No
07-5366	Male	4y2m	Yes	Yes	No	No	No	No	No	No	No	1.15	No
07-5367	Male	13y6m	Yes	No	Yes	No	No	No	Yes	No	No	-0.35	No
07-5370	Female	7y2m	Yes	Yes	No	Yes	No	No	Yes	No	Yes	0.46	No
07-5371	Female	14y6m	Yes	No	No	No	No	No	Yes	No	No	-0.22	No
07-5372	Male	5y3m	Yes	No	No	No	No	No	No	No	No	0.37	No
07-5373	Female	12y5m	Yes	No	No	Yes	No	No	Yes	No	No	0.42	No
07-5381	Female	7y8m	Yes	Yes	No	No	No	No	Yes	No	No	2.22	No
07-5383	Male	11y	Yes	No	No	No	No	No	No	No	No	1.22	No
07-5387	Male	13y4m	Yes	No	Yes	Yes	Yes	No	No	No	No	0.59	No
07-5389	Female	14y4m	No	Yes	No	Yes	Yes	No	No	No	No	0.55	No
07-5390	Male	7y6m	Yes	No	No	Yes	No	No	No	No	No	1.55	No
07-5391	Male	6y10m	No	No	No	No	No	No	No	No	No	1.01	Yes
07-5392	Female	14y3m	Yes	No	No	Yes	No	No	No	No	No	0.11	No
07-5393	Female	13y9m	No	No	No	Yes	No	No	No	No	No	0.99	No
07-5400	Male	13y4m	No	No	Yes	No	Yes	Yes	No	No	No	0.54	No
07-5401	Female	9y9m	Yes	Yes	Yes	Yes	No	No	No	No	No	1.35	No
07-5403	Female	10y11m	No	Yes	Yes	Yes	No	No	No	No	No	1.34	No
07-5404	Male	14y5m	No	No	No	No	No	No	No	No	No	30.42	Yes
07-5405	Female	6y1m	Yes	Yes	No	No	No	No	Yes	No	No	1.62	No
07-5408	Male	5y7m	No	No	No	No	No	No	Yes	No	No	0.94	Yes
07-5411	Female	7y2m	No	No	No	No	No	No	No	No	No	0.52	Yes
07-5412	Female	7y7m	No	No	No	Yes	No	No	No	No	No	42.03	Yes
07-5413	Female	6y10m	Yes	No	Yes	No	No	No	Yes	No	No	0.68	No
07-5414	Male	11y6m	Yes	No	Yes	Yes	No	No	Yes	No	No	1.85	No
07-5415	Male	7y8m	Yes	Yes	No	No	No	Yes	Yes	No	No	1.02	No
07-5416	Male	12y3m	Yes	No	Yes	No	No	No	No	No	No	0.63	No
07-5417	Male	12y5m	No	Yes	No	No	No	No	No	No	No	17.15	Yes
07-5418	Female	5y5m	Yes	No	No	No	No	No	No	No	No	1.5	No
07-5419	Male	10y7m	Yes	Yes	Yes	Yes	No	No	No	No	No	-0.03	No
07-5420	Male	11y7m	Yes	No	Yes	No	No	No	No	No	No	1.41	No
07-5422	Female	10y10m	No	No	No	No	No	No	No	Yes	No	0.62	Yes
07-5423	Male	12y9m	Yes	Yes	No	No	No	No	No	No	No	22.67	No
07-5428	Female	14y9m	Yes	No	No	Yes	No	Yes	No	No	No	1.4	No
07-5429	Female	12y	Yes	No	No	No	No	No	No	No	No	-0.17	No
07-5430	Male	5y	Yes	Yes	Yes	No	No	No	No	No	No	0	No
07-5433	Male	6y8m	No	Yes	Yes	No	Yes	No	No	No	No	1.88	No
07-5435	Male	5y3m	No	No	Yes	No	No	No	No	No	No	0.89	No
07-5436	Female	10y10m	No	Yes	Yes	No	No	No	No	No	No	0.44	No
07-5437	Female	6y2m	Yes	Yes	No	No	No	No	Yes	No	No	34.16	No
07-5438	Male	3y5m	Yes	Yes	No	No	No	No	No	No	No	0.82	No
07-5439	Male	12y8m	Yes	No	No	Yes	No	No	No	No	No	0.85	No
07-5444	Female	12y9m	Yes	Yes	No	Yes	No	No	No	No	No	0.53	No
07-5445	Female	5y11m	Yes	No	No	No	No	Yes	No	No	No	0.68	No
07-5446	Male	4y5m	No	Yes	Yes	No	No	No	No	No	No	103.32	No
07-5447	Male	5y2m	Yes	Yes	No	No	No	No	No	No	No	2.43	No
07-5448	Female	4y6m	No	No	Yes	No	No	No	No	No	No	44.18	No
07-5449	Female	10y1m	Yes	No	No	No	No	Yes	No	No	No	0.7	No
07-5450	Male	5y5m	No	No	No	No	No	No	No	Yes	No	2.51	No
07-5451	Female	9y11m	No	No	No	No	No	No	No	No	No	-0.67	No
07-5452	Male	9y2m	No	Yes	No	No	No	No	No	No	No	0.7	No
07-5457	Male	10y5m	No	No	No	No	No	No	No	No	No	1.35	No
07-5458	Female	9y11m	Yes	No	Yes	No	No	No	No	No	No	0.61	No
07-5459	Female	9y10m	No	No	No	Yes	No	No	No	No	No	0.89	No
07-5460	Male	12y8m	No	No	No	Yes	No	No	No	No	No	43.46	No
07-5461	Male	13y	Yes	No	No	No	No	No	No	No	No	16.22	No
07-5462	Male	7y6m	Yes	No	Yes	No	No	No	No	No	No	2.14	No
07-5463	Female	5y10m	Yes	No	No	No	No	No	No	No	Yes	0.74	No
07-5467	Female	13y8m	Yes	Yes	No	No	No	No	No	No	No	0.47	No
07-5469	Female	13y7m	Yes	No	Yes	Yes	No	No	No	No	No	16.66	No
07-5470	Male	6y2m	Yes	Yes	Yes	No	No	No	No	No	No	0.36	No
07-5471	Female	10y2m	Yes	Yes	No	No	No	No	Yes	No	No	1.18	No
07-5473	Male	9y11m	Yes	Yes	No	No	No	No	No	No	No	0.11	No
07-5474	Female	11y9m	Yes	No	No	No	No	No	No	No	No	0.31	No
07-5476	Female	6y9m	No	No	Yes	No	No	No	Yes	No	No	1.42	No
07-5477	Female	6y3m	Yes	No	No	No	No	No	No	No	No	63.67	Yes
07-5481	Male	6y11m	Yes	No	No	No	No	No	Yes	No	No	0.7	No
07-5483	Male	4y8m	No	No	No	No	No	No	No	No	No	0.9	Yes
07-5485	Female	9y1m	Yes	Yes	No	Yes	No	No	No	No	No	0.56	No
07-5489	Male	8y10m	Yes	No	Yes	No	No	No	No	No	No	22.39	No
07-5490	Male	12y8m	Yes	No	Yes	No	No	Yes	No	No	No	1.03	No
07-5491	Male	10y3m	No	No	No	No	No	No	No	No	No	0.16	No
07-5492	Male	13y1m	Yes	No	No	Yes	No	No	No	No	No	0.84	No
07-5494	Female	14y4m	Yes	No	Yes	No	No	No	No	No	No	1.94	No
07-5495	Female	9y6m	Yes	Yes	No	No	No	No	Yes	No	No	0.77	No
07-5496	Male	9y8m	No	No	No	Yes	Yes	No	No	No	No	1.12	Yes
07-5498	Female	9y8m	Yes	Yes	No	No	No	No	No	No	No	27.55	Yes
07-5499	Male	17y	Yes	No	Yes	No	No	Yes	No	No	No	0.42	No
07-5500	Female	12y10m	Yes	No	No	No	No	No	No	No	No	0.5	No
07-5501	Male	14y9m	Yes	No	No	No	No	No	No	No	No	0.28	No
07-5503	Male	11y1m	Yes	No	No	No	No	No	No	No	No	0.76	No
07-5504	Male	12y10m	Yes	Yes	No	No	No	No	Yes	No	No	0.08	No
07-5505	Female	16y6m	No	Yes	No	Yes	Yes	No	Yes	No	No	29.3	No
07-5506	Female	7y	No	Yes	Yes	No	No	No	No	No	No	1.61	No
07-5507	Female	6y3m	No	No	No	No	No	No	No	No	No	41.51	No
07-5508	Male	5y5m	No	Yes	No	No	No	No	No	No	No	0.06	No
07-5509	Male	3y8m	No	No	No	No	No	No	No	No	No	2.29	No
07-5510	Male	15y	No	No	Yes	No	No	No	No	No	No	0.39	No
07-5512	Female	4y8m	Yes	Yes	No	No	No	No	No	No	No	2.07	No
07-5513	Male	5y3m	Yes	Yes	Yes	No	No	No	No	No	No	0.34	Yes
07-5514	Female	7y8m	Yes	No	Yes	No	No	No	No	No	No	0.99	No
07-5515	Female	6y3m	Yes	No	No	No	No	No	No	No	No	69.67	No
07-5516	Female	12y1m	Yes	No	No	No	No	No	No	No	No	1.85	No
07-5517	Male	12y10m	Yes	No	Yes	No	No	No	No	No	No	0.35	No
07-5518	Female	11y1m	Yes	Yes	No	Yes	No	No	No	No	No	3.44	No
07-5519	Male	7y	Yes	No	No	No	No	No	No	No	No	0.25	No
07-5521	Male	7y1m	Yes	Yes	No	No	No	No	No	No	No	1.11	No
07-5522	Female	13y2m	Yes	No	No	No	No	No	No	No	No	0.46	Yes
07-5523	Male	9y7m	Yes	No	No	No	No	No	No	No	No	21.49	No
07-5524	Female	13y9m	Yes	No	No	No	No	No	No	No	No	3.09	No
07-5525	Male	6y6m	Yes	No	No	No	No	No	No	No	No	1.4	No
07-5526	Male	10y11m	Yes	No	No	Yes	No	No	No	No	No	-0.02	No
07-5527	Female	7y7m	Yes	Yes	Yes	No	No	No	No	No	No	0.73	No
07-5528	Female	8y7m	Yes	No	No	No	No	No	No	No	No	63.15	No
07-5529	Female	5y1m	No	Yes	Yes	Yes	No	No	Yes	No	No	10.94	No
07-5530	Female	8y	Yes	Yes	No	No	No	No	No	No	Yes	1.01	Yes
07-5531	Male	10y11m	No	No	No	No	No	No	No	Yes	No	5.75	Yes
07-5534	Male	10y	Yes	No	No	No	No	Yes	No	No	No	37.02	No
07-5535	Female	7y4m	Yes	Yes	Yes	No	No	No	No	No	No	0.45	No
07-5536	Female	13y3m	No	No	No	No	Yes	No	No	No	No	38.77	No
07-5537	Female	4y5m	Yes	Yes	No	No	No	No	No	No	No	2.04	No
07-5539	Male	5y1m	Yes	Yes	No	No	No	No	No	No	No	0.53	No
07-5543	Female	13y	Yes	Yes	No	No	No	No	No	No	No	0.51	No
07-5544	Female	8y	Yes	No	No	No	No	No	Yes	No	No	1.06	No
07-5546	Female	12y	Yes	No	No	Yes	No	No	No	No	No	-0.55	No
07-5548	Male	12y8m	Yes	Yes	No	Yes	No	No	No	No	No	13.91	No
07-5549	Male	3y9m	Yes	No	No	No	No	Yes	No	No	No	0.86	No
07-5550	Male	10y11m	Yes	Yes	No	Yes	No	Yes	No	No	No	33	No
07-5551	Female	10y9m	Yes	Yes	No	Yes	No	No	Yes	No	No	0.36	No
07-5552	Female	8y	Yes	No	No	No	No	No	No	No	No	1.37	Yes
07-5553	Male	3y10m	Yes	Yes	Yes	No	No	No	No	No	No	0.87	No
07-5555	Female	8y2m	Yes	No	No	No	No	No	No	No	No	0.37	No
07-5556	Male	12y5m	Yes	No	No	No	No	No	No	No	No	43.56	No
07-5557	Male	13y3m	Yes	No	No	No	No	No	No	No	No	13.86	No
07-5559	Female	5y7m	No	No	No	No	No	No	No	No	No	0.64	Yes
07-5560	Female	3y8m	No	No	Yes	No	No	No	No	No	No	1.86	No
07-5561	Female	4y10m	Yes	Yes	No	No	No	No	No	No	No	1.77	No
07-5562	Male	12y10m	Yes	No	No	No	No	No	No	No	No	0.8	No
07-5563	Male	11y6m	Yes	No	No	No	No	No	No	No	No	-0.05	No
07-5566	Male	9y7m	Yes	No	No	No	No	No	No	No	No	0.94	No
07-5567	Female	12y9m	Yes	Yes	No	No	No	No	Yes	No	No	0.7	No
07-5568	Female	5y11m	Yes	Yes	No	No	No	No	No	No	No	0.88	No
07-5569	Female	5y2m	No	No	No	No	No	No	No	No	No	1.38	Yes
07-5570	Male	4y6m	No	Yes	No	No	No	No	No	No	No	16.39	No
07-5571	Female	6y5m	Yes	No	No	Yes	No	No	No	No	No	1	No
07-5572	Female	4y11m	No	Yes	Yes	No	No	No	No	No	No	0.71	No
07-5575	Male	6y9m	No	Yes	No	No	No	No	No	No	No	0.97	No
07-5576	Male	6y5m	Yes	No	No	No	No	No	Yes	No	No	1.66	No
07-5577	Female	5y2m	Yes	Yes	Yes	No	No	No	Yes	No	No	36.54	No
07-5579	Female	10y8m	No	No	No	No	No	No	No	No	No	56.41	Yes
07-5580	Female	7y9m	Yes	No	No	No	No	No	No	No	No	17.64	No
07-5581	Male	10y	No	No	No	Yes	Yes	No	No	Yes	No	0.35	No
07-5582	Female	6y2m	Yes	Yes	Yes	No	No	No	No	No	No	0.84	No
07-5584	Female	14y4m	Yes	No	No	No	No	No	No	No	No	-1.1	No
07-5587	Female	5y10m	Yes	Yes	No	No	No	No	No	No	No	-0.08	No
07-5589	Female	13y3m	Yes	Yes	No	Yes	No	No	No	No	No	0.2	Yes
07-5590	Female	8y11m	Yes	No	No	No	No	No	No	No	No	1.16	No
07-5591	Female	5y4m	Yes	No	No	No	No	No	No	No	No	1.77	No
07-5592	Female	8y2m	Yes	No	No	Yes	No	No	No	No	No	0.16	No
07-5596	Male	8y8m	Yes	No	No	Yes	No	No	No	Yes	No	67.45	No
07-5597	Male	7y11m	No	No	No	No	No	No	No	No	Yes	93.81	No
07-5599	Male	3y6m	No	No	Yes	No	No	No	Yes	No	No	1.27	No
07-5600	Female	10y3m	Yes	No	No	Yes	No	No	No	No	No	1.13	No
07-5601	Male	10y2m	Yes	Yes	No	No	No	Yes	No	No	No	26.47	No
07-5602	Female	6y2m	Yes	No	No	No	No	Yes	No	No	No	1.53	No
07-5603	Male	7y3m	Yes	Yes	Yes	No	No	Yes	No	No	No	0.83	No
07-5605	Male	9y7m	Yes	Yes	Yes	Yes	No	No	Yes	No	No	0.73	No
07-5606	Female	5y4m	Yes	No	No	No	No	No	Yes	Yes	No	2.85	No
07-5608	Male	6y9m	No	No	No	No	No	No	No	Yes	No	0.86	No
07-5612	Male	12y6m	Yes	Yes	No	No	No	Yes	Yes	No	No	-0.17	No
07-5613	Female	7y5m	Yes	No	No	No	No	No	Yes	No	No	0.52	No
07-5615	Female	8y8m	Yes	Yes	No	Yes	No	No	No	No	No	1.74	No
07-5616	Male	5y11m	Yes	Yes	No	No	No	No	No	No	No	0.26	No
07-5618	Male	8y7m	Yes	Yes	Yes	No	No	No	No	No	No	0.42	No
07-5619	Female	10y1m	Yes	No	No	No	No	No	No	No	No	0.26	No
07-5621	Female	5y6m	Yes	Yes	No	No	No	No	Yes	No	No	-0.32	No
07-5622	Male	8y2m	Yes	No	No	No	No	No	No	No	No	0.43	No
07-5623	Female	5y3m	Yes	No	No	Yes	No	No	Yes	No	No	1.5	No
07-5624	Male	7y5m	No	No	No	Yes	No	No	No	No	No	0.82	No
07-5625	Female	5y6m	Yes	Yes	Yes	No	No	No	No	No	No	-0.42	Yes
07-5626	Female	11y2m	Yes	No	No	No	No	No	No	No	No	23.52	No
07-5628	Female	5y4m	Yes	No	No	Yes	No	No	No	No	No	16.31	No
07-5630	Female	13y	Yes	No	No	No	No	No	No	No	No	0.17	Yes
07-5631	Female	9y7m	Yes	No	Yes	Yes	No	Yes	No	No	No	1.49	No
07-5632	Male	12y	No	Yes	No	Yes	No	No	No	No	No	0.43	No
07-5635	Male	9y1m	Yes	Yes	Yes	Yes	No	No	Yes	No	No	1.55	No
07-5636	Female	12y6m	Yes	Yes	No	Yes	No	No	No	No	No	0.12	No
07-5637	Female	9y4m	No	No	No	No	No	No	No	No	No	0.88	Yes
07-5638	Male	10y5m	Yes	No	No	Yes	No	No	No	No	No	0.69	No
08-5639	Female	12y1m	Yes	No	No	Yes	No	No	No	No	No	-0.13	No
08-5641	Female	11y6m	Yes	No	Yes	No	No	No	No	No	No	0.22	No
08-5642	Female	8y7m	Yes	No	No	No	No	No	No	No	No	0.17	No
08-5643	Male	5y4m	No	No	No	No	No	No	No	No	No	33.41	Yes
08-5644	Male	9y2m	Yes	No	Yes	No	No	No	No	No	No	0.7	No
08-5646	Male	15y10m	Yes	No	Yes	No	No	Yes	No	No	No	0.57	No
08-5647	Female	11y11m	Yes	No	No	No	No	No	No	No	No	-0.46	No
08-5649	Female	9y5m	Yes	No	Yes	No	No	No	No	No	No	0.22	No
08-5652	Male	5y7m	Yes	No	No	No	No	No	No	No	No	2.36	No
08-5653	Male	3y9m	No	Yes	No	No	No	No	No	No	No	0.62	No
08-5654	Male	11y4m	Yes	No	No	Yes	No	No	No	No	No	2.04	No
08-5655	Female	11y7m	Yes	No	No	No	No	No	No	No	No	2.07	No
08-5657	Male	4y2m	Yes	Yes	Yes	No	No	No	No	No	No	1.2	No
08-5658	Female	6y1m	Yes	No	No	No	No	No	No	No	No	1.29	No
08-5659	Male	9y6m	Yes	No	Yes	No	No	No	No	No	No	2.05	No
08-5660	Female	5y3m	Yes	Yes	No	No	No	No	No	No	No	1.13	No
08-5663	Male	6y	Yes	No	Yes	No	No	No	No	No	No	1.1	No
08-5664	Male	6y3m	Yes	No	No	No	No	No	No	No	No	0.55	No
08-5665	Male	6y4m	Yes	Yes	No	No	No	No	Yes	No	No	1.1	Yes
08-5666	Female	4y11m	Yes	Yes	No	No	No	No	No	No	No	0.65	No
08-5667	Male	3y3m	Yes	No	Yes	No	No	No	No	No	No	34.52	No
08-5668	Male	3y8m	Yes	Yes	No	No	No	No	No	No	No	1.72	No
08-5669	Male	4y3m	Yes	Yes	No	Yes	Yes	No	No	No	Yes	0.67	No
08-5670	Female	6y11m	Yes	No	No	No	No	No	No	No	No	1.14	No
08-5671	Male	6y	Yes	Yes	No	No	No	No	No	No	No	0.21	No
08-5672	Male	6y11m	Yes	Yes	No	No	No	No	No	No	No	0.24	No
08-5673	Female	11y5m	Yes	Yes	No	No	No	No	No	No	No	30.35	No
08-5674	Female	9y5m	Yes	No	No	No	No	Yes	No	No	No	0.23	No
08-5675	Male	11y2m	Yes	No	No	Yes	No	Yes	No	No	No	28.44	No
08-5676	Male	8y9m	Yes	No	No	No	No	No	No	No	No	0.23	No
08-5678	Female	12y5m	No	No	No	No	No	No	No	No	No	0.35	No
08-5679	Female	3y10m	Yes	No	No	No	No	No	No	No	No	0.99	No
08-5680	Male	8y10m	Yes	Yes	No	No	No	No	No	No	No	0.34	No
08-5681	Male	5y11m	Yes	No	No	No	No	No	No	No	No	0.41	No
08-5682	Male	13y4m	Yes	No	No	No	No	No	Yes	No	No	-0.2	No
08-5683	Male	13y2m	Yes	No	Yes	No	No	No	No	No	No	10.31	No
08-5684	Female	4y3m	Yes	No	No	No	Yes	No	Yes	No	No	0.3	No
08-5685	Male	11y5m	Yes	No	No	No	Yes	No	No	No	No	17.59	No
08-5686	Female	8y9m	Yes	Yes	No	No	No	No	Yes	No	No	0.81	No
08-5691	Male	7y10m	No	No	Yes	No	No	No	No	No	No	2.17	Yes
08-5692	Female	14y7m	No	No	No	No	No	No	No	No	No	0.32	No
08-5693	Male	13y4m	No	No	No	No	No	No	No	No	No	0.12	No
08-5694	Female	13y	No	No	Yes	No	No	No	No	No	No	24.88	No
08-5696	Male	3y6m	Yes	No	No	No	No	No	No	No	No	1.28	No
08-5697	Female	8y	Yes	Yes	Yes	Yes	No	No	No	No	No	0.81	No
08-5698	Female	12y1m	Yes	Yes	No	No	No	No	No	No	No	21.54	No
08-5704	Female	7y2m	Yes	No	No	Yes	Yes	No	No	No	No	0.03	No
08-5706	Female	7y8m	Yes	No	No	No	No	No	No	No	No	42.92	No
08-5708	Male	5y	Yes	No	Yes	No	No	Yes	No	No	No	0.32	No
08-5709	Male	8y	Yes	Yes	Yes	No	No	No	No	No	No	0.25	No
08-5710	Female	7y	Yes	Yes	No	No	No	No	No	No	No	1.51	No
08-5711	Female	6y1m	No	Yes	No	No	No	No	Yes	No	No	40.04	Yes
08-5712	Female	8y7m	Yes	No	Yes	No	No	Yes	No	No	No	0.55	No
08-5713	Male	7y9m	No	No	Yes	No	No	No	No	No	No	1.54	No
08-5716	Male	6y11m	Yes	No	No	Yes	No	No	No	No	No	0.86	No
08-5718	Male	8y11m	Yes	No	No	No	No	No	No	No	No	15.25	Yes
08-5719	Female	7y3m	Yes	No	No	No	No	No	No	No	No	0.14	No
08-5721	Male	6y11m	Yes	No	No	No	No	No	No	No	No	10.2	No
08-5722	Male	5y4m	Yes	No	Yes	No	No	No	No	No	No	1.14	No
08-5723	Female	6y2m	No	No	No	No	No	No	No	No	No	0.79	No
08-5724	Male	6y9m	Yes	Yes	Yes	No	No	No	No	No	No	0.3	No
08-5725	Female	9y7m	Yes	No	No	No	No	No	No	No	No	0.19	No
08-5728	Female	8y9m	Yes	No	No	No	No	No	No	No	No	0.48	No
08-5731	Male	8y4m	Yes	Yes	No	No	No	No	No	No	Yes	2.38	No
08-5733	Male	7y5m	Yes	Yes	Yes	No	No	No	No	Yes	No	1.11	No
08-5734	Male	8y	Yes	Yes	Yes	No	No	No	No	No	No	2.88	No
08-5736	Male	14y6m	No	No	No	No	No	No	No	Yes	No	17.17	No
08-5739	Female	9y3m	No	No	No	No	Yes	No	No	No	No	28.22	No
08-5740	Male	10y6m	Yes	No	Yes	No	No	Yes	No	No	No	20.34	No
08-5742	Male	8y2m	Yes	Yes	No	No	No	Yes	No	No	No	0.8	No
08-5743	Male	5y10m	Yes	Yes	No	No	No	Yes	No	No	No	1.63	No
08-5744	Male	11y6m	No	No	No	No	No	No	No	No	No	0.46	No
08-5745	Male	7y2m	No	No	No	Yes	No	No	No	Yes	No	0.45	No
08-5746	Female	9y1m	Yes	No	Yes	No	No	Yes	No	No	No	0.6	No
08-5748	Female	13y8m	Yes	No	Yes	No	No	No	No	No	No	50.16	No
08-5749	Female	7y2m	Yes	No	No	No	No	No	No	No	No	0.3	No
08-5750	Male	10y1m	No	No	No	No	Yes	No	No	No	No	24.19	No
08-5752	Male	9y10m	No	No	No	Yes	Yes	No	No	No	No	-0.19	No
08-5753	Female	15y6m	No	No	Yes	No	No	No	No	No	No	35.09	No
08-5754	Female	7y3m	Yes	No	Yes	No	No	No	No	No	No	1.04	No
08-5755	Male	8y3m	Yes	No	No	No	No	Yes	No	No	No	0.39	No
08-5756	Female	4y2m	Yes	No	No	No	No	No	No	No	No	2.33	No
08-5757	Male	5y	Yes	No	No	Yes	No	No	No	No	No	1.15	No
08-5758	Female	9y	Yes	No	No	Yes	No	No	No	No	No	0.88	No
08-5759	Female	8y5m	No	No	Yes	Yes	No	No	No	No	No	0.79	No
08-5761	Male	6y7m	Yes	No	No	No	No	No	No	No	No	0	No
08-5763	Male	4y10m	Yes	No	No	No	No	No	No	No	No	0.09	No
08-5764	Female	6y4m	No	Yes	No	No	No	No	Yes	No	No	0.51	No
08-5765	Male	6y4m	Yes	Yes	No	Yes	No	No	No	No	No	0.12	No
08-5766	Male	11y4m	Yes	No	No	No	No	Yes	No	No	No	-0.03	No
08-5768	Male	10y6m	No	No	Yes	No	No	No	No	No	No	0.43	No
08-5769	Male	9y1m	Yes	No	No	Yes	No	No	No	No	No	50.66	No
08-5770	Male	11y2m	Yes	No	No	Yes	No	No	No	No	No	1.16	No
08-5773	Male	6y3m	Yes	Yes	Yes	No	Yes	No	Yes	No	No	25.53	No
08-5776	Male	8y2m	No	Yes	Yes	No	No	No	No	No	No	-0.05	No
08-5777	Female	8y2m	Yes	Yes	No	Yes	No	No	No	No	No	0.73	No
08-5778	Female	12y3m	Yes	No	No	Yes	No	No	Yes	No	No	22.43	No
08-5780	Female	11y5m	No	No	Yes	No	No	No	No	No	No	-1.23	No
08-5782	Female	8y5m	Yes	Yes	Yes	Yes	No	Yes	No	No	No	-0.02	No
08-5783	Female	11y	Yes	No	Yes	Yes	No	No	No	No	No	1.06	No
08-5784	Male	7y2m	Yes	No	No	No	Yes	No	No	No	No	37.85	Yes
08-5785	Female	7y8m	Yes	No	No	No	No	No	No	No	No	1.22	No
08-5786	Female	9y7m	Yes	Yes	No	Yes	No	No	No	No	No	17.36	No
08-5787	Female	9y4m	Yes	No	No	No	No	Yes	No	No	No	-0.41	No
08-5788	Male	8y3m	Yes	No	No	No	No	No	No	No	No	9.29	No
08-5789	Female	10y1m	Yes	No	No	No	No	Yes	No	No	No	75.13	No
08-5790	Female	3y11m	Yes	No	No	No	No	No	No	No	No	12.33	No
08-5792	Male	6y5m	No	No	No	No	No	No	No	No	No	0.31	No
08-5793	Male	7y6m	No	No	No	No	No	No	No	No	No	0.04	No
08-5794	Male	14y8m	No	Yes	Yes	Yes	Yes	No	No	No	No	0.3	No
08-5795	Male	4y5m	No	No	No	No	No	Yes	No	Yes	No	0.07	No
08-5796	Male	7y	Yes	Yes	No	No	No	No	No	No	No	1.32	No
08-5797	Male	7y	Yes	Yes	Yes	No	No	No	No	No	No	0.22	No
08-5798	Female	10y5m	Yes	Yes	No	No	No	No	No	No	No	1.18	No
08-5799	Male	9y5m	Yes	No	No	No	No	No	No	No	No	0.56	Yes
08-5801	Female	12y5m	Yes	No	No	No	No	No	No	No	No	0.62	No
08-5802	Female	7y11m	Yes	No	No	Yes	No	No	No	No	No	0.86	No
08-5803	Female	6y4m	Yes	No	No	Yes	No	No	No	No	No	0.63	No
08-5804	Male	3y6m	Yes	No	Yes	No	No	No	No	No	No	5.18	No
08-5805	Female	4y3m	Yes	No	No	No	No	No	No	No	No	1.22	Yes
08-5808	Male	9y2m	Yes	No	Yes	Yes	No	Yes	No	No	No	0.03	No
08-5811	Female	3y1m	Yes	No	No	No	No	No	No	No	No	29.66	No
08-5812	Male	3y3m	Yes	No	Yes	No	No	No	No	No	No	1.63	No
08-5813	Female	6y8m	Yes	No	No	No	No	No	No	No	No	0.91	No
08-5814	Male	11y	Yes	No	No	No	No	No	No	No	No	0.75	No
08-5815	Male	7y5m	No	Yes	No	No	No	No	No	No	No	60.75	No
08-5816	Male	9y3m	Yes	Yes	No	Yes	No	No	No	No	No	10.42	No
08-5817	Female	7y	Yes	Yes	No	No	No	No	Yes	No	No	1.32	No
08-5818	Male	4y7m	Yes	Yes	No	No	No	No	No	No	No	1.71	No
08-5819	Male	7y3m	No	Yes	No	No	No	No	Yes	No	No	1.54	No
08-5821	Male	7y9m	No	Yes	Yes	No	No	No	No	No	No	1.82	No
08-5823	Male	6y1m	No	Yes	Yes	No	No	No	No	No	No	24.23	No
08-5825	Female	9y8m	Yes	No	No	No	No	No	No	No	No	1.02	No
08-5827	Female	6y10m	No	No	No	No	No	No	No	No	No	0.54	Yes
08-5828	Female	9y10m	Yes	No	No	No	No	No	No	No	No	0.75	No
08-5832	Female	3y8m	No	Yes	No	No	No	No	Yes	No	No	3.06	No
08-5833	Male	13y2m	No	No	Yes	No	No	No	No	No	No	0.64	No
08-5834	Female	15y1m	Yes	Yes	No	No	No	No	No	No	No	0	No
08-5835	Female	7y4m	Yes	Yes	No	No	No	No	No	No	No	0.62	No
08-5836	Male	6y2m	No	Yes	No	No	No	No	No	No	No	0.96	No
08-5837	Female	5y5m	Yes	No	No	No	No	No	No	No	No	94.08	No
08-5839	Male	10y9m	Yes	No	No	Yes	No	No	No	No	No	20.62	No
08-5840	Male	13y4m	Yes	No	Yes	No	No	No	No	No	No	0.74	No
08-5841	Male	6y5m	Yes	No	No	No	No	No	No	No	No	0.87	No
08-5842	Female	11y10m	Yes	No	No	Yes	No	No	No	No	No	52.04	No
08-5843	Female	8y9m	Yes	No	No	No	No	No	No	No	No	0.35	No
08-5844	Male	3y11m	Yes	No	No	No	Yes	No	No	No	No	0.7	No
08-5845	Male	12y5m	Yes	No	No	No	No	Yes	No	No	No	22.25	No
08-5846	Female	9y1m	Yes	No	No	No	No	No	No	No	No	0.94	No
08-5847	Female	5y2m	Yes	No	No	No	No	No	No	No	No	0.37	No
08-5848	Female	4y10m	Yes	No	No	No	No	No	No	No	No	0.62	No
08-5849	Male	8y	Yes	No	No	No	No	No	No	No	No	1.94	No
08-5850	Male	7y1m	No	Yes	Yes	No	No	No	No	No	No	0.08	No
08-5851	Male	5y10m	No	No	No	No	No	No	No	No	No	45.19	Yes
08-5853	Male	12y6m	Yes	No	No	No	No	No	No	No	No	11.96	No
08-5854	Male	8y5m	No	No	No	No	Yes	No	No	No	No	0.18	No
08-5855	Male	6y4m	Yes	No	No	No	No	No	No	No	No	0.6	No
08-5856	Male	4y4m	Yes	No	No	No	No	No	No	Yes	No	1.32	No
08-5857	Male	6y10m	Yes	No	No	No	No	No	No	No	No	0.52	No
08-5858	Male	5y7m	Yes	Yes	Yes	No	No	No	No	No	No	0.86	No
08-5859	Male	7y2m	Yes	No	Yes	No	Yes	No	No	No	No	0.26	No
08-5860	Male	7y4m	Yes	No	No	No	No	No	No	No	No	0.94	No
08-5861	Female	10y5m	Yes	Yes	No	No	No	No	No	No	Yes	0.49	No
08-5862	Female	6y1m	Yes	Yes	No	No	No	No	Yes	No	No	1.26	No
08-5863	Male	5y1m	Yes	Yes	No	No	No	No	No	No	No	4.74	No
08-5864	Male	4y9m	Yes	Yes	No	No	No	No	No	No	No	1.02	No
08-5865	Male	9y3m	No	No	No	Yes	No	No	No	No	No	0.79	No
08-5866	Male	5y5m	No	No	No	Yes	No	No	No	No	No	0.31	No
08-5867	Male	8y2m	Yes	No	No	No	No	No	No	No	No	-0.18	No
08-5870	Female	7y6m	Yes	Yes	No	No	No	No	Yes	No	No	1.73	No
08-5872	Male	6y3m	Yes	No	No	No	No	No	No	No	No	2.27	No
08-5875	Female	5y11m	Yes	No	No	No	No	No	Yes	No	No	-0.05	No
08-5876	Male	7y2m	No	Yes	Yes	No	No	No	No	No	Yes	0.61	No
08-5877	Male	5y7m	No	Yes	Yes	No	No	No	No	No	No	1.09	No
08-5879	Male	10y4m	No	No	No	No	Yes	No	No	No	No	0.92	No
08-5880	Male	4y11m	Yes	Yes	No	No	Yes	No	No	No	No	0.86	No
08-5882	Male	6y3m	Yes	No	No	No	No	No	No	No	No	0.79	No
08-5884	Female	9y5m	Yes	No	No	No	No	No	Yes	No	No	1.64	No
08-5885	Female	6y2m	Yes	Yes	No	No	No	No	No	No	No	0.6	No
08-5886	Male	5y1m	Yes	No	No	No	No	No	No	No	No	1.99	No
08-5887	Female	6y4m	Yes	No	No	No	No	No	No	No	No	1.05	No
08-5888	Female	12y2m	No	No	No	No	No	No	Yes	Yes	No	0.99	No
08-5889	Female	17y11m	No	No	Yes	No	No	No	No	No	No	-0.02	No
08-5891	Male	5y5m	Yes	No	No	No	No	Yes	No	No	No	4.69	No
08-5892	Female	14y11m	Yes	No	No	No	No	No	No	No	No	39.39	No
08-5893	Male	12y4m	Yes	No	No	No	No	No	No	No	No	51.07	No
08-5895	Male	13y2m	Yes	No	No	No	No	No	No	No	No	1.72	No
08-5897	Female	9y11m	Yes	No	No	No	No	No	No	No	No	16.41	No
08-5898	Female	13y	Yes	Yes	No	Yes	No	No	Yes	No	No	-0.34	No
08-5900	Male	6y9m	Yes	Yes	No	No	No	No	Yes	No	No	0.14	No
08-5902	Female	3y8m	Yes	Yes	No	No	No	No	No	No	No	1.38	No
08-5903	Male	10y3m	No	No	No	No	No	No	No	Yes	No	0.85	No
08-5904	Female	3y8m	Yes	Yes	Yes	No	No	No	No	No	No	0.84	No
08-5905	Male	5y2m	Yes	Yes	Yes	No	No	No	No	No	No	0.94	No
08-5907	Male	4y7m	Yes	Yes	Yes	No	No	No	No	No	No	0.77	No
08-5908	Female	6y	Yes	Yes	No	No	No	No	Yes	No	No	1.1	No
08-5909	Female	3y7m	Yes	No	No	No	No	Yes	No	No	No	0.8	No
08-5910	Male	4y8m	Yes	Yes	No	No	No	No	Yes	No	No	1.2	Yes
08-5911	Male	6y7m	Yes	Yes	No	No	No	No	No	No	No	0.59	No
08-5913	Male	5y2m	Yes	No	No	No	No	No	No	No	No	2.68	No
08-5917	Female	6y7m	Yes	No	No	No	No	No	No	No	No	0.5	No
08-5918	Female	4y7m	Yes	No	No	No	No	No	Yes	No	No	0.33	No
08-5920	Male	5y8m	Yes	Yes	Yes	No	No	No	No	Yes	No	0.73	No
08-5922	Female	7y5m	Yes	No	No	No	No	No	No	No	No	3.59	No
08-5923	Female	11y7m	Yes	No	Yes	No	No	No	No	No	No	0.7	No
08-5924	Female	5y	Yes	Yes	No	No	No	No	No	No	No	1.07	No
08-5925	Male	9y8m	Yes	No	No	No	No	No	No	No	No	46.73	No
08-5926	Male	6y5m	Yes	Yes	No	Yes	No	No	No	Yes	No	-0.34	No
08-5928	Female	6y3m	Yes	No	No	No	No	No	No	No	No	1.98	No
08-5930	Female	3y10m	Yes	Yes	No	No	No	No	No	No	No	1.38	No
08-5932	Female	7y4m	Yes	No	No	No	No	No	Yes	No	Yes	1.8	No
08-5933	Male	5y1m	Yes	Yes	No	No	No	No	No	No	Yes	1.6	No
08-5934	Male	5y	Yes	No	No	No	No	No	No	No	No	1.63	No
08-5936	Female	5y8m	Yes	No	Yes	No	No	Yes	No	No	No	1.19	No
08-5937	Male	10y11m	Yes	No	No	No	No	No	No	No	No	13.04	No
08-5940	Male	9y1m	Yes	No	No	No	No	No	No	No	No	0.07	No
08-5941	Male	7y11	Yes	Yes	No	No	No	No	No	No	No	2.82	No
08-5942	Female	6y3m	Yes	No	No	No	No	No	No	No	No	0.4	No
08-5943	Female	10y9m	No	No	No	No	No	No	No	No	No	0.22	Yes
08-5944	Female	7y10m	No	Yes	Yes	No	No	No	No	No	No	0.91	No
08-5946	Female	7y7m	Yes	Yes	Yes	No	No	No	No	No	No	-0.88	No
08-5947	Female	11y7m	Yes	No	No	No	No	Yes	No	No	No	1.02	No
08-5948	Male	8y3m	Yes	No	No	No	No	No	No	No	No	-0.03	No
08-5949	Female	9y6m	No	No	No	No	No	No	No	No	No	0.21	Yes
08-5950	Male	5y7m	No	No	Yes	No	No	No	No	No	No	0.89	No
08-5952	Male	14y9m	Yes	Yes	No	Yes	No	Yes	No	No	No	30.5	No
08-5954	Female	4y2m	No	No	No	Yes	No	No	Yes	No	No	0.49	No
08-5955	Male	12y	Yes	Yes	No	No	No	No	No	No	No	0.37	No
08-5956	Male	11y11m	No	Yes	No	Yes	No	No	No	No	No	22.92	No
08-5957	Female	6y4m	Yes	Yes	No	No	No	No	No	No	No	3.99	No
08-5958	Male	7y5m	Yes	No	No	No	No	No	No	No	No	56.38	No
08-5959	Female	10y10m	Yes	No	No	No	No	No	No	No	No	38.02	No
08-5960	Male	5y10m	Yes	Yes	No	No	No	No	Yes	No	No	0.79	No
08-5961	Female	9y6m	Yes	No	No	No	No	No	No	No	No	0.44	No
08-5962	Female	7y8m	Yes	No	No	No	No	No	No	No	No	0.15	No
08-5964	Female	8y4m	No	Yes	Yes	No	No	No	No	Yes	No	1.74	No
08-5966	Male	12y7m	Yes	No	No	No	No	No	No	No	No	0.54	No
08-5967	Male	8y5m	Yes	No	No	No	No	No	No	No	No	0.04	No
08-5968	Male	13y2m	No	No	No	No	No	No	No	No	No	0.68	Yes
08-5970	Female	4y10m	Yes	No	No	Yes	No	No	Yes	No	No	1.08	No
08-5972	Female	3y11m	Yes	Yes	No	No	No	No	No	No	No	2.22	No
08-5974	Female	9y8m	Yes	No	No	No	No	No	No	No	No	3.54	No
08-5975	Female	5y10m	Yes	No	Yes	No	No	No	No	No	No	15.26	Yes
08-5976	Female	8y1m	Yes	No	No	No	No	No	No	No	No	0.93	No
08-5977	Female	12y8m	No	No	No	No	No	No	No	No	No	0.98	No
08-5979	Male	9y	Yes	No	No	No	No	No	No	No	No	1.03	No
08-5980	Male	6y3m	Yes	No	No	No	No	No	No	No	No	0.75	No
08-5981	Female	10y3m	Yes	No	No	No	No	No	No	No	No	0.18	No
08-5982	Female	6y5m	Yes	Yes	No	No	No	No	Yes	No	No	2.92	No
08-5983	Male	9y11m	Yes	No	No	Yes	No	No	No	No	No	0.86	No
08-5984	Male	13y7m	Yes	No	No	Yes	No	No	No	No	No	0.69	No
08-5985	Male	5y3m	Yes	Yes	Yes	No	No	No	No	No	No	76.88	No
08-5986	Male	6y2m	Yes	Yes	Yes	No	No	No	No	No	No	0.46	No
08-5987	Male	3y6m	No	No	Yes	No	No	No	No	No	No	0.93	No
08-5988	Male	3y	No	Yes	Yes	Yes	Yes	No	No	No	No	1.04	No
08-5989	Male	5y2m	No	Yes	No	No	No	No	No	No	Yes	0.58	No
08-5991	Female	8y4m	No	Yes	No	No	No	No	No	No	No	0.97	Yes
08-5992	Female	9y3m	Yes	No	Yes	No	No	No	No	No	No	0.77	No
08-5993	Female	9y7m	Yes	No	Yes	No	No	No	No	No	No	0.43	No
08-5994	Male	10y7m	Yes	No	No	No	No	No	No	No	No	0.76	No
08-5999	Female	9y	Yes	No	No	No	No	No	No	No	No	0.38	No
08-6000	Male	6y	Yes	Yes	No	No	No	No	Yes	No	No	21.39	No
08-6001	Female	6y4m	Yes	No	No	No	No	No	Yes	No	No	13.32	No
08-6002	Female	9y1m	Yes	No	No	No	No	No	No	No	No	-0.183	No
08-6003	Female	4y9m	Yes	Yes	No	No	No	No	No	No	No	0.78	No
08-6005	Female	6y6m	No	No	No	No	No	No	No	No	No	0.87	No
08-6006	Male	9y	Yes	Yes	Yes	No	No	No	No	No	No	1.04	No
08-6007	Female	3y6m	Yes	Yes	No	No	No	No	No	No	No	0.99	No
08-6009	Female	7y5m	Yes	Yes	No	No	No	No	No	No	No	32.37	No
08-6010	Male	6y	Yes	No	No	No	No	No	No	No	No	1.5	No
08-6011	Male	4y2m	Yes	Yes	No	No	No	No	No	No	No	1.81	Yes
08-6013	Female	10y6m	Yes	No	No	No	No	No	No	No	No	0.62	No
08-6015	Male	9y5m	Yes	No	No	No	No	No	No	No	No	38.72	No
08-6017	Female	6y	No	No	Yes	No	No	No	No	No	No	0	No
08-6018	Male	10y1m	No	No	Yes	No	No	No	No	No	No	14.33	No
08-6021	Male	11y11m	Yes	No	Yes	No	No	No	No	No	No	0.15	No
08-6023	Male	10y11m	Yes	No	No	No	No	No	Yes	No	No	34.87	No
08-6024	Male	13y8m	Yes	Yes	Yes	No	No	No	No	No	No	1.02	No
08-6025	Female	6y4m	Yes	No	No	No	No	No	No	No	No	47.96	No
08-6026	Female	10y3m	Yes	No	No	No	No	No	No	No	No	63.01	No
08-6027	Male	7y5m	Yes	No	No	No	No	No	No	No	No	-0.04	No
08-6028	Female	9y10m	Yes	Yes	No	No	No	No	No	No	No	40.1	No
08-6029	Female	6y1m	Yes	Yes	No	No	No	No	No	No	Yes	0.29	No
08-6030	Male	7y4m	Yes	No	No	No	No	No	No	No	No	0.73	No
08-6031	Female	6y8m	No	Yes	No	No	No	No	Yes	No	No	0.85	Yes
08-6033	Female	5y11m	No	Yes	No	Yes	No	Yes	No	No	No	1.84	No
08-6034	Female	6y7m	Yes	No	No	No	No	No	Yes	No	No	0.53	No
08-6035	Male	12y7m	No	No	No	No	No	No	No	No	No	0.25	No
08-6036	Male	9y9m	Yes	Yes	No	Yes	No	No	No	No	No	0.65	No
08-6037	Male	6y8m	Yes	No	No	Yes	No	No	Yes	No	Yes	1.16	No
08-6038	Female	7y4m	Yes	Yes	Yes	No	No	No	No	No	Yes	0.74	No
08-6040	Female	5y8m	Yes	No	No	No	No	No	No	No	No	2.26	No
08-6041	Male	7y4m	Yes	No	No	No	No	No	No	No	No	-0.08	No
08-6044	Female	7y	Yes	No	Yes	No	No	No	No	No	No	0.7	No
08-6045	Male	11y	Yes	No	No	No	No	No	No	No	No	0.18	No
08-6046	Female	7y5m	No	No	Yes	No	No	No	No	No	No	108	No
08-6047	Female	8y7m	Yes	Yes	No	No	No	No	No	No	No	69.16	No
08-6048	Male	8y4m	Yes	No	Yes	No	No	No	No	No	No	0.82	No
08-6049	Male	13y5m	Yes	No	Yes	No	No	No	No	No	No	0.38	No
08-6050	Male	7y2m	No	No	No	No	No	No	No	No	No	0.75	No
08-6051	Male	3y10m	No	No	Yes	No	No	No	No	No	No	1.6	No
08-6052	Female	6y5m	No	No	No	No	No	No	No	No	No	0	No
08-6053	Female	8y	Yes	No	No	No	No	No	No	No	No	0.86	No
08-6054	Male	5y7m	Yes	No	No	No	No	No	No	No	No	0.9	No
08-6055	Male	7y	No	No	Yes	No	No	No	No	No	No	2.82	No
08-6056	Male	6y5m	Yes	No	Yes	No	Yes	No	No	No	No	0.2	No
08-6057	Female	10y4m	Yes	No	No	No	No	No	No	No	No	1.08	No
08-6059	Female	6y3m	Yes	No	No	No	No	No	No	No	No	0.49	No
08-6060	Male	8y6m	Yes	Yes	No	No	No	No	Yes	No	No	0.56	No
08-6062	Female	10y10m	No	No	Yes	No	No	No	No	No	No	85.03	No
08-6063	Male	8y	Yes	Yes	No	No	No	No	No	No	No	1.03	No
08-6064	Male	7y6m	Yes	No	Yes	No	No	No	No	No	No	1.15	No
08-6065	Male	4y4m	No	Yes	No	No	No	No	No	No	No	1.64	No
08-6066	Male	13y	No	No	Yes	No	No	No	No	No	No	-0.57	No
08-6068	Female	4y5m	Yes	No	No	No	No	No	No	No	No	44.88	No
08-6069	Female	7y3m	Yes	No	No	No	No	Yes	No	No	No	1.33	No
08-6070	Male	10y9m	No	Yes	No	No	No	No	No	No	No	0.85	No
08-6071	Male	12y4m	Yes	No	No	No	No	No	No	No	No	0.46	No
08-6072	Female	8y3m	Yes	No	No	No	No	No	No	No	No	0.41	No
08-6075	Female	10y4m	Yes	No	Yes	No	No	No	Yes	No	No	-0.06	No
08-6076	Male	11y7m	Yes	No	No	Yes	No	Yes	No	No	No	4.01	No
08-6077	Female	6y11m	Yes	No	No	No	No	No	No	No	No	1.68	No
08-6079	Male	9y5m	Yes	Yes	Yes	No	No	No	No	No	No	0	No
08-6080	Male	10y9m	Yes	No	Yes	No	No	No	No	No	No	0.09	No
08-6081	Female	7y10m	Yes	No	Yes	No	No	No	No	No	No	1.01	No
08-6082	Male	7y	Yes	No	No	No	No	No	No	No	No	0.2	No
08-6083	Female	3y	Yes	Yes	No	No	No	No	No	No	No	5.83	No
08-6084	Male	7y2m	No	Yes	No	No	No	No	No	No	No	0.92	No
08-6085	Male	6y2m	Yes	Yes	No	No	No	No	Yes	No	No	1.38	No
08-6086	Male	6y7m	Yes	Yes	No	No	No	Yes	No	No	Yes	0.32	No
08-6087	Male	13y2m	No	No	No	No	No	No	No	Yes	No	0.45	No
08-6089	Male	4y7m	No	Yes	Yes	No	No	No	No	No	No	3.48	No
08-6090	Male	8y4m	Yes	No	Yes	No	No	No	No	No	No	1.27	No
08-6091	Female	6y7m	Yes	Yes	No	No	No	No	No	No	No	1.87	Yes
08-6092	Female	6y	Yes	Yes	No	No	No	No	No	No	No	0.91	No
08-6094	Male	12y2m	Yes	No	No	No	No	No	No	No	No	0.05	No
08-6095	Male	5y1m	No	Yes	Yes	No	No	No	No	No	No	122.47	No
08-6097	Female	8y11m	Yes	No	No	Yes	No	No	No	No	No	0.91	No
08-6098	Female	3y8m	Yes	No	No	No	No	No	No	No	No	2.87	No
08-6099	Female	8y7m	Yes	Yes	No	No	No	Yes	No	No	No	43.93	No
08-6100	Male	4y8m	Yes	No	No	No	No	No	No	No	No	4.07	No
08-6102	Male	3y8m	Yes	No	Yes	No	No	No	No	No	No	1.63	Yes
08-6103	Male	8y5m	Yes	No	No	No	No	Yes	No	No	No	2.05	No
08-6104	Female	6y6m	No	No	No	Yes	No	No	No	No	No	1.91	No
08-6105	Male	8y10m	Yes	No	No	Yes	No	Yes	No	No	No	0.81	Yes
08-6106	Female	8y3m	Yes	No	No	No	No	No	Yes	No	No	0.65	No
08-6107	Male	11y5m	No	No	No	Yes	No	Yes	No	No	No	0.01	No
08-6109	Male	4y4m	No	No	No	No	No	No	No	No	No	0.5	No
08-6110	Male	4y11m	Yes	Yes	No	No	No	No	No	No	No	138.46	No
08-6112	Female	5y4m	Yes	Yes	No	Yes	No	No	No	No	No	0.98	No
08-6113	Male	5y8m	Yes	Yes	No	No	No	Yes	No	No	No	0.38	No
08-6114	Male	5y8m	Yes	No	Yes	No	No	No	No	No	No	94.93	No
08-6115	Female	5y9m	Yes	No	No	No	No	No	No	No	No	1.47	No
08-6116	Male	3y3m	Yes	No	No	No	No	No	No	No	No	0.46	Yes
08-6117	Female	6y4m	Yes	No	No	No	No	No	No	No	No	0.86	No
08-6119	Male	3y10m	Yes	Yes	Yes	No	No	No	No	No	No	1.94	No
08-6120	Male	11y9m	No	No	No	No	No	No	No	Yes	No	-0.99	No
08-6121	Male	5y11m	Yes	Yes	No	No	No	No	No	No	No	0.26	Yes
08-6122	Female	16y6m	No	No	No	Yes	Yes	No	No	No	No	0.42	No
08-6123	Female	5y5m	Yes	No	No	No	No	No	No	No	No	-0.33	No
08-6124	Male	4y8m	Yes	Yes	No	No	No	No	Yes	No	No	21.43	No
08-6125	Male	3y2m	Yes	Yes	Yes	No	No	No	No	No	No	2.25	No
08-6126	Female	11y8m	Yes	No	No	No	No	No	No	No	No	49.14	No
08-6127	Male	11y5m	No	No	No	No	No	No	No	No	No	-0.28	No
08-6128	Female	7y7m	No	No	No	No	No	No	No	No	No	41.91	Yes
08-6129	Male	5y11m	Yes	No	No	No	No	No	No	No	No	1.58	No
08-6130	Male	5y2m	Yes	Yes	Yes	No	No	No	No	No	No	1.3	No
08-6131	Male	8y7m	Yes	No	No	No	No	No	No	No	No	0.56	No
08-6132	Male	7y8m	No	No	No	No	No	Yes	No	No	No	3.32	No
08-6133	Male	13y2m	Yes	No	No	No	No	No	No	No	No	-0.21	No
08-6134	Female	5y4m	Yes	No	Yes	No	No	No	No	No	No	2.74	No
08-6138	Female	10y8m	No	No	No	No	No	No	No	Yes	No	0.35	No
08-6139	Male	9y7m	Yes	Yes	No	Yes	No	Yes	No	No	No	0.39	No
08-6140	Male	13y8m	No	Yes	No	No	No	No	Yes	No	Yes	1.42	No
08-6141	Male	13y2m	Yes	No	No	Yes	No	No	No	No	No	11.59	No
08-6143	Female	8y5m	Yes	No	No	Yes	No	No	No	No	No	2.51	No
08-6146	Female	8y2m	Yes	No	No	No	No	No	No	No	No	1.14	No
08-6147	Female	8y2m	Yes	No	No	Yes	No	No	Yes	No	No	1.25	No
08-6148	Male	11y7m	No	No	No	No	No	No	No	No	No	0.54	Yes
08-6149	Male	9y4m	No	No	No	No	No	No	No	No	No	1.66	No
08-6150	Female	7y8m	Yes	No	No	No	No	No	No	No	No	1.21	No
08-6151	Male	8y9m	No	Yes	Yes	No	No	No	No	No	No	20.18	Yes
08-6152	Male	4y3m	Yes	Yes	Yes	No	No	No	No	No	No	1.59	No
08-6153	Male	11y3m	Yes	No	No	No	No	No	No	No	No	0.31	No
08-6154	Male	8y10m	Yes	No	No	No	No	No	Yes	No	No	1.74	No
08-6155	Female	6y2m	Yes	Yes	No	No	No	No	Yes	No	No	5.08	No
08-6157	Female	9y4m	Yes	No	No	Yes	No	Yes	No	No	No	0.77	No
08-6159	Male	5y9m	Yes	Yes	No	No	No	No	Yes	Yes	No	0.08	No
08-6160	Female	8y6m	Yes	Yes	No	No	No	No	No	No	Yes	1.99	No
08-6161	Female	10y2m	No	No	No	Yes	No	No	No	No	No	0.65	No
08-6162	Male	15y5m	Yes	No	No	Yes	No	Yes	No	No	No	24.51	No
08-6163	Female	3y11m	Yes	Yes	No	No	No	No	No	No	No	1.1	No
08-6164	Female	6y6m	Yes	Yes	No	No	No	No	Yes	No	No	1.35	No
08-6165	Female	4y3m	Yes	No	No	No	No	No	Yes	No	No	0.43	No
08-6167	Male	8y6m	Yes	No	No	No	No	No	No	No	No	0.73	No
08-6169	Female	11y1m	No	No	No	No	No	No	No	No	No	0.12	Yes
08-6170	Male	8y5m	Yes	Yes	No	No	No	No	No	No	No	0.25	No
08-6172	Female	3y1m	No	Yes	No	No	No	No	No	Yes	No	1	Yes
08-6174	Female	7y6m	No	No	No	No	No	No	No	No	No	1.15	No
08-6175	Female	5y3m	Yes	No	No	No	No	No	No	No	No	0.41	Yes
08-6176	Female	7y7m	Yes	No	Yes	No	No	No	No	No	No	0.72	No
08-6177	Male	4y10m	Yes	Yes	No	No	No	No	Yes	No	No	1.64	Yes
08-6178	Male	15y4m	No	Yes	No	No	No	No	No	No	No	37.08	No
08-6179	Female	3y11m	No	No	No	No	No	No	No	No	No	2.45	Yes
08-6180	Female	5y7m	Yes	No	No	No	No	No	No	No	No	1.46	No
08-6181	Female	12y6m	Yes	No	No	No	No	No	No	No	No	0.85	No
08-6182	Female	4y1m	Yes	Yes	No	No	No	No	No	Yes	No	-0.75	No
08-6183	Female	6y3m	Yes	No	No	No	No	No	No	No	No	0.72	No
08-6184	Female	12y	Yes	Yes	Yes	No	No	No	No	No	No	0.97	No
08-6185	Male	4y4m	Yes	Yes	No	No	No	No	No	No	No	0.16	No
08-6187	Male	3y11m	Yes	Yes	No	No	No	No	No	No	No	0.92	No
08-6188	Male	8y1m	Yes	Yes	Yes	No	No	No	No	No	No	1.2	No
08-6189	Male	9y	Yes	No	No	No	No	No	No	No	No	1.34	No
08-6190	Male	7y7m	Yes	Yes	No	No	No	No	No	No	Yes	1.11	No
08-6193	Female	13y10m	Yes	Yes	No	No	No	No	No	No	No	-0.49	No
08-6194	Female	8y1m	Yes	No	No	No	No	No	No	No	No	0.43	No
08-6196	Female	5y7m	Yes	No	No	No	No	No	No	No	No	89.75	No
08-6199	Male	8y5m	No	No	No	No	No	No	No	No	Yes	0.72	No
08-6200	Female	7y11m	Yes	Yes	No	Yes	No	No	No	No	No	1.1	No
08-6202	Female	5y10m	Yes	Yes	Yes	No	No	No	Yes	No	No	1.04	No
08-6203	Male	10y4m	Yes	No	Yes	Yes	No	No	No	No	No	0.34	No
08-6204	Female	5y7m	Yes	Yes	No	Yes	No	No	No	No	No	0.66	No
08-6205	Male	7y11m	Yes	No	Yes	No	No	No	No	No	No	57.41	No
08-6206	Male	7y3m	No	Yes	No	No	No	No	No	No	Yes	-0.28	No
08-6207	Female	14y	Yes	No	No	No	No	No	No	No	No	-0.02	No
08-6212	Male	4y	No	No	No	No	No	No	No	No	No	1.48	No
08-6213	Female	5y10m	Yes	Yes	No	No	No	No	No	No	No	12.82	No
08-6214	Female	13y11m	No	No	No	No	Yes	No	Yes	No	No	0.16	No
08-6215	Male	3y1m	Yes	No	No	No	No	No	No	No	No	0.92	No
08-6216	Female	6y5m	Yes	Yes	No	No	No	No	No	No	No	1.56	No
08-6217	Female	10y10m	Yes	Yes	No	No	No	No	No	No	No	0.04	No
08-6218	Female	15y6m	Yes	No	No	No	No	Yes	No	No	No	68.33	No
08-6219	Male	8y11m	Yes	Yes	No	No	No	No	No	No	No	1.86	No
08-6220	Male	11y8m	Yes	No	No	No	No	No	No	No	No	42.53	No
08-6221	Male	7y1m	Yes	No	No	No	No	No	No	No	No	1.1	No
08-6222	Female	10y5m	Yes	No	No	No	No	No	No	No	No	0.21	Yes
08-6223	Female	7y7m	No	Yes	No	No	No	No	Yes	No	No	0.57	Yes
08-6224	Male	7y	Yes	Yes	No	No	No	No	No	No	No	4.59	No
08-6225	Female	7y5m	No	No	No	No	No	No	Yes	No	No	0.26	No
08-6226	Male	8y2m	Yes	No	No	No	No	No	No	No	No	0.74	No
08-6227	Male	15y4m	No	No	Yes	No	Yes	No	No	No	No	0.94	No
08-6228	Female	14y6m	No	No	No	No	No	No	No	No	No	0.32	Yes
08-6229	Female	8y6m	No	No	No	No	No	No	No	No	No	1.25	Yes
08-6230	Female	11y1m	No	No	No	No	No	No	No	No	No	0.09	No
08-6231	Male	7y9m	Yes	No	No	No	No	No	No	No	No	-0.02	No
08-6232	Female	6y10m	Yes	No	No	No	No	No	No	No	No	0.86	No
08-6233	Female	5y6m	Yes	No	No	No	No	No	No	No	No	1.5	No
08-6234	Female	6y9m	Yes	Yes	No	Yes	No	No	Yes	No	No	0.82	No
08-6235	Male	5y5m	Yes	No	No	No	No	No	No	No	No	0.76	Yes
08-6236	Female	4y5m	Yes	Yes	No	No	No	No	No	Yes	No	53.21	No
08-6237	Male	9y6m	Yes	No	No	No	No	No	No	No	No	23.62	No
08-6238	Female	9y2m	No	No	No	No	No	No	No	No	No	28.14	No
08-6239	Male	6y6m	Yes	Yes	No	No	No	No	No	No	No	0.49	No
08-6241	Female	4y7m	No	No	Yes	No	No	No	Yes	No	No	0.57	No
08-6242	Male	13y	No	No	No	No	No	No	Yes	No	No	-0.43	Yes
08-6243	Female	8y4m	Yes	No	No	No	No	No	No	No	No	0.64	No
08-6244	Female	8y10m	Yes	No	No	No	No	No	No	No	No	0.87	No
08-6245	Male	5y2m	Yes	No	No	No	No	No	No	No	No	1.26	No
08-6247	Male	11y8m	Yes	Yes	No	No	No	No	Yes	No	No	19.14	No
08-6248	Male	14y5m	No	No	No	No	No	No	No	No	No	19.13	No
08-6249	Female	5y5m	No	Yes	No	No	No	No	No	No	No	0.27	No
08-6250	Female	10y9m	Yes	No	Yes	Yes	No	No	No	No	No	1.48	No
08-6251	Female	8y6m	Yes	No	No	No	No	No	No	No	No	0.32	No
08-6252	Female	5y10m	Yes	Yes	No	No	No	No	No	No	No	0.9	No
08-6253	Male	3y1m	No	No	No	No	No	No	No	No	No	22.23	Yes
08-6254	Male	5y11m	Yes	Yes	No	No	No	No	No	No	No	0.35	No
08-6255	Female	6y5m	Yes	No	No	No	No	No	No	Yes	No	0.61	Yes
08-6256	Female	9y1m	Yes	Yes	No	Yes	No	No	No	No	No	1.83	No
08-6257	Female	11y2m	Yes	No	Yes	No	No	No	No	No	No	0.98	No
08-6258	Male	11y4m	Yes	No	No	Yes	No	No	No	No	No	0.78	No
08-6259	Female	5y	Yes	No	No	No	No	No	Yes	No	No	1.09	No
08-6260	Female	12y5m	Yes	No	No	No	No	No	No	No	No	0.78	No
08-6261	Male	9y3m	No	Yes	No	No	No	No	No	No	Yes	0.41	No
08-6263	Female	4y2m	Yes	No	No	Yes	No	No	No	No	No	1	No
08-6264	Female	6y5m	Yes	Yes	No	No	No	No	No	No	No	0.68	No
08-6265	Male	7y3m	Yes	No	No	No	No	No	No	No	No	1.34	No
08-6266	Female	6y8m	Yes	No	No	No	No	No	No	No	No	0.33	No
08-6267	Male	8y5m	Yes	Yes	No	No	No	No	No	No	No	66.84	No
08-6268	Male	6y3m	Yes	No	No	No	No	No	No	No	No	0.36	No
08-6269	Male	14y1m	Yes	No	No	Yes	No	Yes	Yes	No	No	11.35	No
08-6270	Female	8y6m	Yes	No	Yes	No	No	No	No	No	No	0.41	No
08-6272	Female	5y	Yes	Yes	No	No	No	No	No	No	No	0.92	No
08-6273	Female	7y3m	No	Yes	Yes	No	No	No	No	No	Yes	0.86	No
08-6274	Male	14y1m	Yes	Yes	No	No	No	Yes	No	No	No	21.93	No
08-6275	Male	7y6m	Yes	Yes	No	No	No	No	No	No	No	0.04	No
08-6276	Male	8y6m	Yes	Yes	No	No	No	No	Yes	No	No	0.31	No
08-6278	Male	6y6m	Yes	Yes	No	No	No	No	No	No	No	0.43	No
08-6280	Male	6y9m	Yes	No	No	No	No	Yes	No	No	No	2.57	No
08-6281	Female	7y9m	Yes	No	No	No	No	No	No	No	No	-0.06	No
08-6282	Male	11y	Yes	No	No	Yes	No	No	No	No	No	0.51	No
08-6283	Female	10y6m	Yes	No	No	No	No	No	No	No	No	0.59	No
08-6284	Female	9y	Yes	No	No	No	No	No	No	No	No	0.37	No
08-6285	Male	7y4m	Yes	No	No	No	No	No	No	No	No	1.36	No
08-6286	Female	5y8m	Yes	No	No	No	No	No	No	No	No	0.52	No
08-6287	Male	5y4m	Yes	No	No	No	No	No	No	No	No	1.2	No
08-6288	Female	7y5m	Yes	Yes	No	No	No	No	Yes	No	Yes	46.49	No
08-6290	Female	8y6m	Yes	No	No	No	No	No	No	No	Yes	2.18	No
08-6291	Female	12y11m	Yes	Yes	No	No	No	No	No	No	No	0.72	No
08-6293	Male	13y6m	Yes	No	No	Yes	No	Yes	Yes	No	No	30.78	Yes
08-6294	Male	5y6m	No	Yes	No	No	No	No	No	Yes	No	24.1	No
08-6295	Male	7y8m	Yes	Yes	No	No	No	No	No	No	Yes	0.57	No
08-6296	Male	5y9m	Yes	No	No	No	No	No	No	No	No	0.29	No
08-6297	Male	7y8m	Yes	Yes	Yes	No	No	No	No	No	No	0.94	No
08-6299	Male	9y8m	Yes	No	No	Yes	No	Yes	No	No	No	1.27	No
08-6300	Female	12y	Yes	No	No	Yes	No	No	No	No	No	-0.35	No
08-6302	Female	6y6m	Yes	No	Yes	No	No	No	No	No	No	0.42	No
08-6303	Male	5y10m	No	No	No	Yes	Yes	No	No	No	No	1.22	Yes
08-6304	Female	8y6m	Yes	No	Yes	No	No	No	No	No	No	0.27	No
08-6305	Male	3y7m	Yes	Yes	No	No	No	No	No	Yes	No	0.92	No
08-6306	Female	8y5m	Yes	No	No	Yes	No	Yes	No	No	No	-0.05	No
08-6307	Female	9y5m	Yes	No	No	Yes	No	No	Yes	No	No	0.81	No
08-6308	Female	7y10m	Yes	No	No	No	No	No	No	No	No	1.69	No
08-6310	Male	9y6m	Yes	No	No	No	No	No	No	No	No	-0.02	No
08-6313	Male	3y11m	Yes	No	No	No	No	No	No	No	No	3.5	No
08-6316	Male	13y4m	Yes	No	No	No	No	Yes	No	No	No	20	No
08-6317	Female	9y8m	Yes	Yes	No	No	No	No	No	No	Yes	0.66	No
08-6318	Female	6y9m	Yes	No	No	No	No	No	No	No	No	-0.71	No
08-6319	Female	5y	Yes	Yes	No	No	No	No	No	No	No	3.78	No
08-6320	Female	12y10m	Yes	Yes	No	No	No	No	Yes	Yes	No	0.85	No
08-6321	Female	6y10m	Yes	No	No	No	No	No	No	No	No	0.66	No
08-6322	Female	5y3m	Yes	No	No	No	No	No	No	No	No	1.33	No
08-6323	Male	11y9m	Yes	No	Yes	No	No	Yes	No	No	No	2.15	No
08-6324	Male	6y11m	Yes	No	No	No	No	No	No	No	No	-0.18	No
08-6325	Male	12y10m	No	Yes	No	No	No	No	No	No	Yes	0.64	No
08-6326	Female	6y7m	Yes	No	No	No	No	No	No	No	No	29.16	No
08-6327	Male	7y8m	No	No	No	No	No	No	No	No	No	-0.1	Yes
08-6328	Male	7y7m	Yes	No	No	No	No	No	No	No	No	9.25	No
08-6330	Female	7y8m	Yes	No	Yes	No	No	No	No	No	No	0.39	No
08-6331	Male	4y11m	No	No	No	Yes	No	No	No	No	No	1.33	No
08-6332	Male	3y8m	Yes	No	No	No	No	No	No	No	No	0.25	No
08-6333	Female	8y8m	Yes	No	No	No	No	No	No	No	No	0.45	No
08-6334	Female	8y7m	Yes	No	No	No	No	No	No	No	No	0.18	No
08-6335	Male	5y7m	Yes	Yes	No	No	No	Yes	No	No	Yes	-0.01	No
08-6336	Male	9y2m	No	Yes	No	No	No	No	No	No	Yes	21.53	No
08-6337	Male	4y6m	Yes	Yes	No	No	No	No	Yes	No	Yes	31.28	No
08-6338	Female	11y9m	Yes	Yes	No	No	No	No	No	No	No	0.76	No
08-6339	Female	4y9m	No	No	No	No	No	No	No	No	No	50.17	Yes
08-6340	Male	8y6m	Yes	Yes	No	No	No	No	No	No	No	32.44	No
08-6341	Female	12y10m	Yes	No	No	No	No	No	No	No	No	0.69	No
08-6343	Male	11y1m	Yes	No	No	No	No	No	No	No	No	0.37	No
08-6344	Female	11y	Yes	No	No	No	No	No	No	No	No	54.3	No
08-6345	Male	12y7m	Yes	Yes	No	Yes	No	No	No	No	No	23.72	No
08-6346	Male	8y11m	Yes	Yes	No	No	No	Yes	No	No	No	0.29	No
08-6347	Male	9y	Yes	Yes	No	No	No	Yes	No	No	No	1.17	No
08-6348	Female	14y	Yes	No	No	No	No	No	Yes	No	No	0.36	No
08-6349	Male	3y8m	Yes	Yes	No	No	No	No	No	No	No	42.2	No
08-6350	Male	4y4m	Yes	No	No	No	No	No	No	No	No	59.81	No
08-6351	Male	10y4m	No	No	Yes	No	No	No	No	No	No	0.64	No
08-6352	Male	10y5m	Yes	No	No	No	No	No	No	No	No	0.8	Yes
08-6354	Male	6y1m	Yes	No	Yes	No	No	No	No	No	No	0.48	No
08-6355	Female	8y7m	No	No	Yes	No	No	No	No	No	No	0.94	No
08-6356	Female	9y7m	Yes	No	No	No	No	No	No	No	No	58.7	No
08-6357	Female	8y8m	Yes	Yes	No	No	No	No	No	No	No	2.52	No
08-6359	Male	11y11m	Yes	No	No	No	No	No	No	No	No	19.22	No
08-6361	Male	14y11m	Yes	No	No	No	No	No	No	No	No	0.47	No
08-6362	Male	9y8m	Yes	Yes	No	No	No	No	No	No	No	17.38	No
08-6363	Male	6y3m	Yes	No	No	No	No	No	No	No	No	0.76	No
08-6364	Female	5y10m	Yes	No	No	No	No	No	Yes	No	No	1.21	No
08-6365	Female	10y8m	Yes	No	No	Yes	No	No	No	No	No	1.78	No
08-6366	Female	11y9m	Yes	No	Yes	Yes	No	No	No	No	No	0.94	No
08-6367	Female	4y5m	Yes	No	No	No	No	No	No	No	No	0.44	No
08-6368	Female	4y2m	No	Yes	No	Yes	No	No	No	No	No	0.35	No
08-6369	Male	7y2m	Yes	Yes	No	No	No	No	No	No	Yes	1.12	No
08-6370	Male	9y11m	No	No	No	No	No	No	No	No	No	1	No
08-6372	Male	13y	Yes	Yes	Yes	No	No	No	No	No	No	55.41	No
08-6373	Male	7y7m	Yes	No	Yes	No	No	No	No	No	No	1.08	No
08-6374	Male	10y1m	No	No	Yes	No	No	No	No	No	No	0.46	No
08-6375	Male	9y7m	Yes	No	No	Yes	No	No	No	No	No	1.08	Yes
08-6379	Male	5y8m	Yes	Yes	No	No	No	No	No	No	No	0.49	No
08-6380	Female	12y5m	No	No	No	No	No	No	No	Yes	No	0.1	No
08-6381	Male	8y8m	Yes	No	No	No	No	No	No	No	No	0.3	No
08-6382	Male	12y11m	No	No	No	No	No	No	No	No	No	18.07	Yes
08-6383	Female	12y11m	No	No	No	No	No	No	No	No	No	57.66	Yes
08-6384	Female	8y1m	Yes	No	No	No	No	No	No	No	No	32.54	No
08-6385	Male	7y9m	No	No	No	No	No	No	No	No	No	0.69	No
08-6387	Male	7y4m	Yes	No	No	No	No	No	No	No	No	-0.01	No
08-6388	Male	11y3m	No	No	No	Yes	No	No	No	No	No	0.88	No
08-6389	Male	8y	Yes	No	No	No	No	No	No	No	No	9.04	No
08-6390	Female	9y6m	Yes	No	No	No	No	No	No	No	No	0.08	No
08-6391	Male	13y	Yes	No	No	No	No	No	Yes	No	No	0.64	No
08-6392	Female	9y2m	No	No	No	Yes	No	No	Yes	No	No	0.67	No
08-6394	Female	10y8m	No	Yes	Yes	No	No	No	No	No	No	15.39	No
08-6395	Male	12y4m	No	No	Yes	No	No	No	No	No	No	20.72	No
08-6396	Female	7y10m	Yes	Yes	Yes	No	No	No	No	No	No	0.14	No
08-6397	Female	8y9m	Yes	Yes	No	No	No	No	No	No	No	0.26	No
08-6398	Male	16y9m	Yes	No	No	No	No	No	No	No	No	35.34	No
08-6399	Female	6y2m	Yes	No	Yes	No	No	No	No	No	No	1.24	No
08-6400	Male	4y	No	Yes	Yes	Yes	No	No	No	Yes	No	1.58	No
08-6401	Female	7y5m	Yes	No	Yes	No	No	No	Yes	No	No	0.8	No
08-6402	Male	7y4m	Yes	Yes	No	No	No	No	No	No	No	36.66	No
08-6403	Male	10y9m	Yes	No	Yes	Yes	No	No	No	No	No	0.05	No
08-6406	Male	3y9m	No	Yes	No	No	No	No	No	No	No	1.21	No
08-6408	Male	10y6m	Yes	Yes	No	No	No	No	Yes	No	No	0.27	No
08-6409	Male	14y2m	Yes	No	No	No	No	No	No	No	No	0.34	No
08-6410	Female	7y3m	No	No	No	No	No	No	No	No	No	1.56	No
08-6411	Female	10y8m	No	No	Yes	No	No	No	No	No	No	-0.45	No
08-6412	Male	8y5m	Yes	No	No	Yes	No	No	Yes	No	No	0.84	No
08-6413	Male	4y11m	Yes	No	No	No	No	Yes	No	Yes	No	0.77	No
08-6415	Female	7y5m	Yes	Yes	Yes	No	No	No	Yes	No	No	0.63	No
08-6416	Male	11y9m	Yes	Yes	No	No	No	No	No	No	No	0.79	No
08-6417	Male	4y11m	Yes	No	No	No	No	No	Yes	No	No	0.74	No
08-6418	Female	6y11m	Yes	Yes	No	Yes	No	No	No	Yes	No	0.72	No
08-6420	Female	13y3m	Yes	No	Yes	No	No	No	No	No	No	0.01	No
08-6421	Male	9y	No	No	No	No	No	No	No	No	No	-0.64	Yes
08-6424	Male	11y6m	Yes	Yes	No	No	No	No	No	No	No	0.83	Yes
08-6428	Male	6y5m	Yes	Yes	No	No	No	No	No	No	No	-0.08	Yes
08-6429	Female	7y7m	Yes	Yes	No	No	No	No	No	No	No	2.39	No
08-6430	Female	6y9m	Yes	Yes	No	No	No	No	Yes	No	No	1.04	No
08-6432	Male	11y3m	No	No	No	No	No	No	No	No	No	0.37	No
08-6433	Male	6y	No	No	No	No	No	No	No	Yes	No	24.96	No
08-6434	Female	15y7m	Yes	No	Yes	No	Yes	No	No	No	No	0.15	No
08-6435	Female	7y11m	Yes	No	No	No	No	No	No	No	No	0.89	No
08-6438	Male	7y	No	No	No	No	No	No	No	No	No	0.99	No
08-6439	Female	12y10m	Yes	Yes	No	No	No	Yes	No	No	No	0.28	No
08-6440	Female	8y11m	No	Yes	No	No	No	No	No	No	Yes	0.27	No
08-6441	Male	8y11m	No	Yes	No	No	No	No	Yes	No	Yes	-0.03	No
08-6442	Male	10y8m	Yes	Yes	No	Yes	No	No	No	No	No	0	No
08-6443	Female	11y2m	Yes	No	No	No	No	No	No	No	No	0.18	No
08-6444	Male	6y8m	Yes	No	Yes	No	No	No	No	No	No	-0.1	No
08-6446	Male	8y	No	Yes	No	Yes	No	No	Yes	No	No	0.11	No
08-6447	Male	6y6m	Yes	Yes	No	No	No	No	No	No	No	1.68	No
08-6448	Female	7y9m	Yes	No	No	No	No	No	No	No	No	0.19	No
08-6450	Female	10y10m	No	No	No	No	No	No	No	Yes	Yes	0.36	No
08-6451	Male	4y6m	Yes	No	No	No	No	No	No	No	No	0.15	No
08-6452	Female	12y11m	Yes	No	No	No	No	No	No	No	No	0.48	No
08-6453	Female	3y4m	No	No	No	No	No	No	No	No	No	1.44	Yes
08-6454	Male	11y3m	Yes	No	No	No	No	No	No	No	No	0.17	No
08-6459	Female	4y4m	Yes	Yes	No	No	No	No	No	No	No	141.92	Yes
08-6461	Female	5y5m	Yes	Yes	No	No	No	No	No	No	No	1.14	No
08-6462	Male	13y5m	No	No	No	No	No	No	No	No	No	-0.01	Yes
08-6464	Male	6y9m	Yes	Yes	Yes	No	No	No	No	No	No	0.52	No
08-6465	Male	8y11m	Yes	Yes	No	No	No	No	No	No	No	0.56	No
08-6467	Female	9y7m	Yes	No	No	No	No	No	No	No	No	1.48	No
08-6468	Female	7y2m	Yes	Yes	No	No	No	No	No	No	No	0.92	No
08-6469	Female	13y3m	Yes	No	Yes	No	No	No	No	No	No	0.57	No
08-6470	Female	7y10m	Yes	No	No	No	No	No	No	No	No	-0.28	No
08-6472	Female	6y5m	Yes	No	No	No	No	No	No	No	No	0.43	No
08-6474	Male	9y2m	Yes	No	Yes	No	No	No	No	No	No	58.09	No
08-6475	Female	7y8m	Yes	No	No	No	No	No	No	No	No	1.47	No
08-6476	Male	6y10m	No	No	Yes	No	No	No	No	No	No	1.08	No
08-6477	Male	11y9m	Yes	No	No	No	No	No	No	No	No	0.71	No
08-6478	Female	10y7m	Yes	No	No	No	No	No	No	No	No	0.3	No
08-6479	Male	7y4m	Yes	No	No	No	No	No	No	No	No	2.13	Yes
08-6480	Female	3y11m	Yes	No	No	No	No	No	No	No	No	112.87	No
08-6481	Male	4y5m	Yes	Yes	No	No	No	No	No	No	No	0.73	Yes
08-6484	Female	7y4m	Yes	No	No	No	No	No	No	No	No	1.07	No
08-6490	Female	5y2m	Yes	No	No	No	No	No	No	No	No	0.07	No
08-6491	Male	11y5m	Yes	Yes	No	Yes	No	No	No	No	No	0.69	No
08-6492	Male	6y1m	No	No	No	No	No	No	No	No	No	0.61	No
08-6495	Male	4y10m	Yes	No	No	No	No	No	No	No	No	-0.43	No
08-6496	Male	5y4m	Yes	No	No	No	No	Yes	No	No	No	5.86	No
08-6498	Female	6y10m	Yes	Yes	No	No	No	No	No	No	No	0.79	No
08-6499	Female	9y2m	No	No	No	No	No	No	No	No	No	1.19	No
08-6500	Female	9y2m	Yes	No	Yes	No	No	No	Yes	No	No	1.17	No
08-6501	Male	12y6m	No	No	No	No	No	No	No	No	No	1.09	No
08-6502	Male	9y6m	No	No	No	Yes	Yes	No	No	No	No	15.49	No
08-6503	Female	9y6m	Yes	No	No	No	No	No	No	Yes	No	30.54	No
08-6504	Male	6y4m	Yes	Yes	No	No	No	No	No	No	No	1.48	No
08-6505	Male	7y7m	Yes	No	No	No	No	No	No	No	No	31.62	No
08-6507	Female	6y11m	No	No	No	No	No	No	No	No	No	26.62	No
08-6508	Male	7y2m	Yes	No	No	No	No	No	No	No	No	1.38	No
08-6510	Male	7y5m	Yes	No	No	No	No	No	No	No	No	0.54	No
08-6513	Male	9y10m	Yes	No	No	No	No	No	Yes	No	No	0.98	No
08-6514	Female	7y9m	Yes	Yes	No	No	No	No	Yes	No	No	1.3	No
08-6516	Male	13y1m	No	No	No	No	No	No	No	No	No	24.08	No
08-6518	Male	13y7m	Yes	No	No	No	No	No	No	No	No	-0.03	No
08-6520	Female	6y2m	Yes	No	No	No	No	No	No	No	No	1.32	No
08-6521	Female	6y2m	Yes	No	No	No	No	No	No	No	No	0.71	No
08-6522	Male	7y8m	Yes	Yes	No	No	No	No	No	No	No	-0.08	No
08-6525	Male	11y4m	Yes	No	No	Yes	No	No	No	No	No	-0.07	No
08-6526	Female	7y6m	Yes	Yes	No	Yes	No	No	No	No	No	0.88	No
08-6527	Male	3y7m	Yes	Yes	No	No	No	No	No	No	No	0.45	No
08-6531	Female	7y3m	No	No	Yes	No	No	No	No	No	No	1.33	No
08-6534	Female	7y7m	Yes	Yes	No	No	No	No	No	No	No	1.37	No
08-6536	Male	11y4m	No	No	No	No	Yes	No	No	No	No	-0.09	No
08-6537	Male	9y9m	Yes	No	No	No	No	No	No	No	No	0.27	No
08-6540	Male	11y6m	No	No	Yes	Yes	No	No	No	No	No	0.66	No
08-6541	Female	8y9m	Yes	No	No	No	No	No	No	No	No	-0.47	No
08-6542	Male	11y8m	No	No	No	No	No	No	Yes	Yes	No	61.03	No
08-6543	Female	7y8m	Yes	No	No	No	No	No	No	No	No	0.31	No
08-6544	Female	6y8m	Yes	No	No	No	No	No	No	No	No	0.35	No
08-6547	Male	4y6m	Yes	No	Yes	No	No	No	No	No	No	0.93	No
08-6548	Female	12y3m	Yes	No	No	No	No	No	No	No	No	-0.05	No
08-6550	Male	11y8m	Yes	No	No	Yes	No	No	No	No	No	0.85	No
08-6553	Male	5y10m	Yes	Yes	No	No	No	No	No	No	No	-0.51	No
08-6554	Female	14y1m	Yes	No	No	No	No	No	No	No	No	27.1	No
08-6555	Female	6y1m	No	Yes	No	No	No	No	Yes	No	No	1.02	No
08-6556	Female	6y2m	Yes	Yes	No	No	No	No	No	No	Yes	0.31	No
08-6557	Female	8y8m	Yes	Yes	No	No	No	No	No	No	No	0.02	No
08-6558	Male	6y	Yes	No	No	No	No	No	No	No	No	0.57	No
08-6559	Male	8y1m	Yes	Yes	No	No	No	No	No	No	No	0.17	No
08-6560	Female	3y4m	Yes	Yes	Yes	No	No	No	No	No	No	11.19	No
08-6561	Male	4y7m	Yes	No	No	No	No	No	No	No	No	-0.23	No
08-6562	Male	13y3m	Yes	No	No	No	No	No	No	No	No	-0.02	No
08-6563	Female	6y5m	Yes	Yes	Yes	No	No	No	No	No	No	0.81	No
08-6564	Male	4y4m	Yes	Yes	No	No	No	No	Yes	No	No	82.16	No
08-6566	Female	4y	Yes	No	No	No	No	No	Yes	No	No	1.21	No
08-6567	Male	8y9m	No	No	No	No	No	No	No	No	No	0.32	No
08-6568	Male	3y10m	No	No	Yes	No	No	No	No	No	No	16.25	No
08-6569	Male	5y6m	No	No	Yes	No	No	No	No	No	No	-10.38	No
08-6570	Female	7y	Yes	No	Yes	No	No	No	No	No	No	3.95	No
08-6571	Male	3y11m	Yes	Yes	Yes	No	No	No	No	No	No	1.59	No
08-6572	Male	4y5m	Yes	No	Yes	No	No	No	No	No	No	45.09	No
08-6573	Female	8y10m	Yes	No	Yes	No	No	No	No	No	No	0.99	No
08-6574	Female	3y5m	No	Yes	Yes	No	No	No	No	No	No	2.32	No
08-6575	Female	9y10m	Yes	No	No	No	No	No	No	No	No	-0.92	No
08-6576	Female	7y11m	Yes	Yes	No	No	No	No	No	No	No	0.34	No
08-6577	Female	9y4m	Yes	No	No	Yes	No	No	Yes	No	No	0.74	No
08-6578	Female	12y7m	Yes	No	No	No	No	No	No	No	No	0.86	No
08-6579	Male	11y	Yes	No	No	No	No	No	No	No	No	17.71	No
08-6580	Female	10y6m	Yes	Yes	No	Yes	No	No	Yes	No	No	55.67	No
08-6581	Male	6y7m	Yes	Yes	No	No	No	No	No	No	No	35.03	No
08-6582	Female	8y	No	Yes	No	No	No	No	Yes	No	No	0.67	No
08-6586	Male	6y10m	No	Yes	Yes	No	No	No	No	No	No	-0.3	No
08-6587	Male	4y2m	Yes	No	No	No	No	No	No	No	No	0.74	No
08-6589	Female	8y5m	Yes	No	No	No	No	No	No	No	No	0.18	No
08-6590	Male	7y6m	Yes	No	No	No	No	No	No	No	No	0.77	No
08-6591	Female	5y2m	No	Yes	Yes	Yes	No	No	No	No	No	1.63	No
08-6592	Female	4y6m	Yes	Yes	No	No	No	No	Yes	Yes	No	2.37	Yes
08-6593	Male	5y11m	Yes	Yes	No	No	No	No	No	No	No	0.37	No
08-6594	Male	14y2m	No	Yes	No	No	No	No	No	No	No	0.89	No
08-6595	Female	11y8m	No	Yes	Yes	No	No	No	No	No	No	0.77	No
08-6596	Male	10y7m	Yes	Yes	No	No	No	No	No	No	No	0.38	No
08-6597	Female	7y10m	No	Yes	No	No	No	No	No	No	No	0.95	No
08-6598	Male	5y7m	Yes	No	No	No	No	Yes	No	No	No	0.48	No
08-6599	Male	12y	Yes	Yes	Yes	No	No	No	No	No	No	0.65	No
08-6600	Female	6y6m	Yes	Yes	No	No	No	No	No	No	No	47.76	No
08-6602	Female	4y1m	Yes	No	No	No	No	No	No	No	No	0.58	No
08-6603	Female	14y9m	Yes	No	No	No	No	Yes	No	No	No	0.39	No
08-6605	Female	7y7m	Yes	Yes	No	Yes	No	No	Yes	Yes	No	0.53	No
08-6608	Male	4y11m	Yes	No	No	No	No	No	No	No	No	0.59	No
08-6610	Male	7y6m	Yes	No	Yes	No	No	No	Yes	No	No	3.4	No
08-6611	Male	8y	Yes	Yes	No	No	No	No	Yes	No	No	63.58	No
08-6612	Male	4y5m	Yes	Yes	No	No	No	No	No	No	No	0.65	No
08-6614	Male	4y9m	Yes	Yes	No	No	No	No	No	No	Yes	0.57	No
08-6615	Male	5y10m	Yes	No	No	No	No	No	No	No	No	1.47	No
08-6617	Female	10y5m	Yes	No	No	No	No	No	Yes	No	No	-14.46	No
08-6618	Female	7y3m	Yes	No	Yes	No	No	No	No	No	No	17.66	No
08-6619	Male	7y10m	Yes	Yes	Yes	No	No	No	No	No	No	10.32	No
08-6620	Male	12y	Yes	No	Yes	No	No	No	No	No	No	-15.61	No
08-6622	Male	4y6m	Yes	No	No	No	No	No	No	No	No	0.65	No
08-6623	Female	5y8m	Yes	Yes	Yes	No	No	No	No	No	No	0.23	No
08-6624	Female	5y11m	Yes	Yes	Yes	No	No	No	No	No	No	1.38	No
08-6627	Female	11y1m	No	No	No	Yes	No	No	Yes	No	No	19.68	No
08-6628	Male	8y8m	Yes	No	No	No	No	No	No	No	No	-8.3	No
08-6629	Male	12y	Yes	No	No	No	No	No	No	No	No	-0.11	No
08-6630	Male	8y7m	No	No	Yes	No	No	No	No	No	No	0.97	Yes
08-6632	Female	14y7m	No	Yes	No	No	No	No	Yes	No	No	-0.5	No
08-6633	Male	8y9m	No	No	No	No	No	No	No	No	No	1.82	Yes
08-6634	Male	7y2m	Yes	Yes	No	No	No	No	No	No	Yes	0.18	No
08-6635	Male	10y1m	Yes	No	Yes	No	No	No	No	No	No	38.47	No
08-6636	Male	3y9m	Yes	No	Yes	No	No	No	No	No	No	0.36	No
08-6639	Female	8y5m	No	Yes	No	No	No	No	No	No	No	-0.17	No
08-6640	Male	12y4m	Yes	No	No	No	No	No	No	No	No	1.04	No
08-6641	Female	13y	Yes	No	No	No	No	No	No	No	No	22.87	No
08-6642	Female	7y2m	Yes	No	No	No	No	No	No	No	No	1.84	No
08-6643	Female	8y12m	No	No	Yes	No	No	No	No	No	No	1.83	No
08-6651	Female	11y	Yes	Yes	No	No	No	No	No	No	No	1.22	No
08-6652	Female	10y10m	Yes	No	No	No	No	No	No	No	Yes	0.42	No
08-6653	Female	12y7m	Yes	Yes	No	No	No	No	Yes	No	No	0.23	No
08-6654	Male	7y8m	Yes	Yes	No	No	No	No	No	No	No	-0.6	No
08-6655	Female	7y1m	Yes	Yes	Yes	No	No	No	Yes	No	No	1.84	No
08-6656	Female	13y7m	Yes	No	Yes	No	No	No	No	No	No	0.15	No
08-6659	Male	11y7m	No	No	No	No	No	No	No	No	No	0.64	Yes
08-6660	Male	8y5m	No	Yes	Yes	No	No	No	Yes	No	No	1.2	No
08-6661	Male	7y5m	Yes	Yes	No	No	No	No	No	No	No	101.88	No
08-6662	Male	11y1m	No	No	No	No	No	No	No	No	No	0.3	Yes
08-6663	Female	10y3m	No	No	No	No	No	No	No	No	No	1.02	Yes
08-6664	Female	6y6m	Yes	Yes	No	No	No	No	No	No	No	0.05	No
08-6665	Male	6y1m	Yes	Yes	No	No	No	No	No	No	No	0.54	No
08-6666	Female	6y5m	Yes	Yes	No	No	No	No	No	No	No	0.33	No
08-6669	Female	8y9m	Yes	No	No	No	No	No	No	No	No	1.74	No
08-6670	Male	5y4m	Yes	No	No	No	No	No	No	No	No	0.37	No
08-6671	Female	14y	Yes	No	Yes	No	No	No	No	No	No	14.24	No
08-6674	Male	10y9m	No	No	Yes	Yes	No	No	No	No	No	0.44	No
08-6676	Male	8y6m	Yes	Yes	No	No	No	Yes	No	No	No	0.36	No
08-6678	Male	6y6m	No	No	Yes	No	No	No	No	No	No	0.34	No
08-6679	Female	7y6m	Yes	No	No	Yes	No	No	No	No	No	87.4	No
08-6680	Female	5y5m	Yes	Yes	Yes	No	No	No	No	No	No	3.33	No
08-6681	Male	8y	Yes	Yes	No	No	No	No	No	No	No	0.97	No
08-6682	Male	8y1m	No	No	No	No	No	No	No	No	No	81.96	No
08-6685	Female	16y4m	Yes	Yes	No	No	Yes	No	No	No	No	38.15	No
08-6686	Female	6y3m	Yes	Yes	No	No	No	No	Yes	No	No	1.16	No
08-6687	Male	4y1m	Yes	No	Yes	No	No	No	No	No	No	11.16	No
08-6689	Male	9y2m	Yes	Yes	No	No	No	No	No	No	No	1.33	No
08-6690	Male	5y11m	No	Yes	No	Yes	No	Yes	Yes	No	No	1.17	No
08-6691	Female	3y11m	Yes	Yes	Yes	No	No	No	No	No	No	1.52	No
08-6692	Male	8y8m	No	No	No	No	No	No	No	No	No	0.96	No
08-6693	Male	8y3m	Yes	No	No	No	No	No	No	No	No	1.65	No
08-6694	Female	11y11m	No	Yes	No	No	No	No	No	No	No	15.16	No
08-6695	Male	10y6m	Yes	No	No	No	No	No	No	No	No	-0.38	No
08-6696	Male	11y11m	No	No	Yes	No	No	No	No	No	No	62.86	No
08-6697	Male	4y8m	Yes	Yes	No	No	No	No	No	No	No	14.81	No
08-6698	Female	12y5m	No	No	Yes	No	No	No	No	No	No	0.04	No
08-6700	Male	9y9m	No	No	Yes	No	No	No	No	No	No	7.49	No
08-6701	Male	7y8m	Yes	No	No	No	No	No	No	No	No	0.51	No
08-6702	Female	8y10m	Yes	No	No	No	No	No	No	No	No	1.32	No
08-6703	Female	8y9m	Yes	Yes	No	No	No	No	No	No	No	4.41	No
08-6704	Male	3y3m	Yes	No	Yes	No	No	No	No	No	No	1.97	No
08-6705	Male	10y5m	Yes	No	Yes	No	No	No	No	No	No	0.8	Yes
08-6706	Male	8y1m	Yes	Yes	No	No	No	No	Yes	No	No	0.08	No
08-6708	Male	11y6m	No	Yes	No	Yes	Yes	No	No	No	No	0.91	No
08-6709	Male	7y9m	Yes	Yes	No	No	No	No	No	No	No	114.03	No
08-6710	Female	7y9m	No	No	Yes	No	No	No	No	No	No	0	No
08-6711	Male	13y1m	Yes	Yes	Yes	No	No	No	No	No	No	14.05	No
08-6712	Female	13y10m	Yes	No	Yes	Yes	No	Yes	No	No	No	0.64	No
08-6713	Male	6y8m	No	No	No	No	No	No	No	Yes	No	0.16	No
08-6714	Male	11y6m	No	No	No	No	No	No	No	No	No	23.99	Yes
08-6716	Female	12y3m	No	No	Yes	No	No	No	No	No	No	0.68	No
08-6717	Male	10y3m	Yes	No	No	No	No	No	No	No	No	0.66	No
08-6718	Female	9y9m	Yes	Yes	No	No	No	No	No	No	No	0.79	No
08-6719	Male	3y6m	No	No	Yes	No	No	No	No	No	No	0.96	No
08-6720	Female	8y11m	No	No	Yes	Yes	No	No	No	No	No	31.62	No
08-6721	Male	11y1m	No	No	No	No	No	No	No	No	No	53.69	No
08-6722	Male	3y2m	Yes	Yes	Yes	No	No	No	No	No	No	1.06	No
08-6723	Female	7y	No	No	Yes	No	No	No	No	No	No	0.92	No
08-6724	Female	8y10m	Yes	Yes	Yes	No	No	No	No	No	No	-0.76	No
08-6725	Male	8y10m	Yes	No	Yes	No	No	No	No	No	No	-1.27	No
08-6727	Male	12y2m	Yes	No	No	No	No	No	No	No	No	30.08	No
08-6728	Female	6y1m	Yes	No	No	No	No	No	No	No	No	0.36	No
08-6729	Male	13y8m	No	No	No	No	No	No	No	No	No	15.29	No
08-6732	Male	13y3m	Yes	No	No	No	No	No	No	No	No	0.04	No
08-6733	Female	5y2m	Yes	Yes	No	No	No	No	Yes	No	No	1.66	No
08-6734	Male	6y9m	Yes	Yes	No	No	No	No	No	No	No	0.91	No
08-6736	Female	8y1m	Yes	Yes	No	No	No	No	No	No	No	0.27	No
08-6737	Male	5y9m	Yes	Yes	Yes	No	No	No	No	No	No	2.58	No
08-6738	Male	4y9m	No	No	Yes	No	No	No	Yes	No	No	2.03	No
08-6739	Female	4y4m	Yes	No	Yes	No	No	No	No	No	No	2.44	No
08-6740	Male	7y1m	Yes	Yes	No	No	Yes	No	No	No	No	0.11	No
08-6742	Female	13y2m	Yes	Yes	No	No	No	No	No	No	No	0.95	No
08-6743	Male	7y11m	No	No	Yes	No	No	No	No	No	No	1.68	No
08-6744	Female	9y6m	Yes	Yes	No	No	No	No	No	No	No	60.91	No
08-6745	Male	7y11m	Yes	No	No	No	No	No	No	No	No	-0.06	No
08-6746	Female	5y4m	Yes	Yes	No	No	No	No	No	No	No	0.5	Yes
08-6748	Male	5y6m	Yes	No	No	No	No	No	No	No	No	2.35	No
08-6749	Female	4y11m	No	Yes	Yes	No	No	No	No	No	No	0.71	No
08-6751	Female	5y8m	Yes	Yes	No	No	No	No	No	No	No	0.13	No
08-6754	Male	8y	Yes	No	Yes	No	No	Yes	No	No	No	32.14	No
08-6755	Female	7y8m	Yes	Yes	No	Yes	No	No	Yes	No	No	-0.32	No
08-6756	Male	7y11m	Yes	No	No	Yes	No	No	No	No	No	3.6	No
08-6757	Male	8y9m	Yes	No	No	No	No	No	No	No	No	17.74	No
08-6758	Male	8y10m	Yes	No	Yes	No	No	No	No	No	No	0.2	No
08-6759	Female	3y3m	Yes	No	No	No	No	No	No	No	No	1.68	No
08-6761	Male	13y8m	Yes	No	No	No	No	No	No	No	No	4.23	Yes
08-6763	Male	13y4m	Yes	No	No	No	No	Yes	No	No	No	0.53	No
08-6764	Female	4y5m	Yes	Yes	No	No	No	No	No	No	No	0.9	No
08-6766	Female	7y3m	Yes	No	Yes	No	No	No	Yes	No	No	0.66	No
08-6767	Male	3y8m	No	No	Yes	No	No	No	No	No	No	1.25	No
08-6768	Male	6y7m	Yes	No	No	No	No	No	No	No	Yes	1.12	No
08-6772	Male	11y11m	Yes	Yes	No	No	No	No	Yes	No	No	-0.02	No
08-6773	Female	9y6m	Yes	No	Yes	No	No	No	No	Yes	No	51.69	Yes
08-6774	Male	6y11m	Yes	Yes	No	No	No	No	Yes	No	No	0.19	No
08-6776	Female	6y1m	Yes	Yes	No	No	No	No	No	No	No	0.89	No
08-6777	Male	6y3m	Yes	Yes	Yes	No	No	No	No	No	No	0.13	No
08-6778	Male	13y9m	Yes	No	Yes	No	No	No	No	No	No	1.26	No
08-6779	Male	6y4m	No	No	No	No	No	No	No	No	No	-0.2	Yes
08-6780	Female	14y2m	No	No	Yes	Yes	No	No	No	No	No	0.44	No
08-6781	Male	9y3m	Yes	No	No	No	No	No	No	No	No	26.68	No
08-6782	Male	8y2m	Yes	Yes	No	No	No	No	No	No	No	1.4	No
08-6783	Female	9y8m	Yes	Yes	No	No	No	No	No	No	No	-2.07	No
08-6784	Female	13y	No	No	No	No	No	No	No	No	No	84.96	No
08-6785	Female	6y7m	No	No	No	No	No	No	No	No	No	1.4	Yes
08-6789	Female	4y8m	Yes	No	No	No	No	No	No	No	No	61.92	No
08-6790	Male	8y	Yes	No	No	No	No	No	No	No	No	0.53	No
08-6791	Male	13y9m	Yes	Yes	No	No	No	No	No	No	No	0.36	No
08-6792	Female	7y	No	No	No	No	No	No	No	No	No	72.6	No
08-6793	Male	7y10m	Yes	No	No	No	No	No	No	No	No	0.12	No
08-6794	Female	7y4m	Yes	No	No	No	No	No	No	No	No	0.41	No
08-6796	Female	5y	Yes	Yes	No	No	No	Yes	No	No	No	0.75	No
08-6797	Female	9y5m	Yes	No	No	Yes	No	No	Yes	No	No	69.6	No
08-6798	Male	8y6m	Yes	No	No	No	No	No	No	No	No	0.13	No
08-6800	Female	12y11m	Yes	Yes	No	No	No	No	No	No	No	45.91	No
08-6801	Male	3y4m	Yes	No	Yes	No	No	No	No	No	No	1.12	No
08-6802	Male	8y2m	Yes	No	Yes	No	No	No	No	No	No	0.8	No
08-6804	Female	3y7m	No	Yes	Yes	No	No	No	No	No	No	0.08	No
08-6805	Male	12y7m	Yes	Yes	Yes	No	No	No	No	No	No	0.05	No
08-6806	Male	8y11m	Yes	No	No	No	No	No	No	No	No	0.45	No
08-6807	Male	13y2m	Yes	No	No	No	No	Yes	No	No	No	0.93	No
08-6809	Female	5y9m	Yes	Yes	No	No	No	No	Yes	No	No	1.3	No
08-6811	Female	5y7m	Yes	Yes	No	No	Yes	No	No	No	Yes	1.41	No
08-6812	Female	12y5m	No	No	Yes	No	No	No	No	No	No	24.88	No
08-6813	Male	4y6m	Yes	Yes	No	No	No	No	No	No	No	28.84	No
08-6814	Male	5y8m	Yes	No	No	No	Yes	No	No	No	No	1.49	No
08-6816	Male	8y11m	No	Yes	No	No	No	No	No	No	No	1.01	No
08-6819	Male	6y9m	Yes	No	No	No	No	No	No	No	No	1.55	No
08-6820	Female	8y1m	Yes	No	Yes	No	No	No	No	No	No	-0.16	No
08-6823	Male	5y5m	Yes	No	No	No	No	No	No	No	No	-0.04	No
08-6824	Male	4y8m	No	No	Yes	No	No	No	No	Yes	No	45.75	No
08-6825	Male	9y3m	Yes	No	No	No	No	No	No	No	No	59.23	No
08-6826	Male	13y11m	Yes	No	No	Yes	No	No	No	No	No	0.44	No
08-6827	Male	9y11m	No	Yes	No	Yes	No	No	No	No	No	73.29	No
08-6828	Female	10y8m	Yes	No	No	No	No	No	No	No	No	1.12	No
08-6829	Female	3y4m	Yes	No	No	No	No	No	No	No	No	1.52	Yes
08-6830	Male	11y4m	Yes	No	Yes	No	No	No	No	No	No	0.72	No
08-6831	Male	5y3m	Yes	No	Yes	No	No	No	No	No	No	1.16	No
08-6833	Male	10y2m	Yes	No	No	No	No	No	No	No	No	1.41	No
08-6835	Female	6y4m	Yes	No	No	No	No	No	No	No	No	0.84	Yes
08-6837	Male	4y5m	No	No	No	No	No	No	No	No	No	0.85	Yes
08-6838	Female	11y11m	Yes	No	No	No	No	No	No	No	No	0.74	No
08-6839	Male	13y8m	Yes	No	Yes	No	No	No	No	No	No	0.23	No
08-6840	Male	6y2m	No	No	No	No	No	No	Yes	No	No	0.63	No
08-6842	Male	4y2m	No	No	No	No	No	No	No	No	No	0.53	No
08-6843	Female	13y3m	No	No	No	No	No	No	No	No	No	-0.26	No
08-6846	Female	4y4m	No	No	No	No	No	No	No	No	No	27.72	Yes
08-6847	Female	10y1m	Yes	No	No	No	No	No	No	No	No	1.48	No
08-6850	Female	4y6m	Yes	No	No	No	No	No	No	No	No	61.57	No
08-6852	Female	4y10m	Yes	No	No	No	No	No	No	Yes	No	0.29	No
08-6853	Male	4y1m	Yes	Yes	No	No	No	Yes	No	No	No	2.04	No
08-6854	Female	12y4m	No	No	Yes	No	No	No	No	No	No	-0.54	No
08-6855	Female	6y7m	Yes	Yes	No	No	No	No	No	No	No	0.35	No
08-6856	Male	7y10m	Yes	No	No	No	No	No	No	No	No	-0.12	No
08-6857	Male	15y11m	Yes	No	No	No	No	No	No	No	No	-0.72	No
08-6858	Female	12y9m	Yes	No	No	No	No	No	No	No	No	0	No
08-6859	Female	12y7m	Yes	No	Yes	No	No	Yes	No	No	No	0.67	No
08-6861	Male	10y	Yes	No	No	No	No	No	No	Yes	No	59.06	No
08-6864	Female	7y7m	Yes	No	No	No	No	No	No	No	No	0.66	No
08-6865	Male	7y5m	Yes	No	No	No	No	No	No	No	No	1.32	No
08-6866	Female	10y5m	Yes	No	Yes	No	No	No	No	No	No	-0.51	No
08-6869	Female	5y1m	Yes	No	No	No	No	No	No	No	No	0.69	No
08-6871	Female	4y8m	Yes	No	No	No	No	No	No	No	No	0.65	No
08-6872	Male	17y5m	No	Yes	No	No	No	No	No	No	No	48.34	No
08-6873	Female	4y10m	Yes	No	No	No	No	No	No	No	No	1.34	No
08-6874	Female	10y10m	Yes	No	No	No	No	No	No	No	No	1.35	No
08-6875	Male	6y2m	No	Yes	Yes	No	No	No	Yes	No	No	0.8	No
08-6876	Male	9y	Yes	No	Yes	No	No	No	No	No	No	8.55	No
08-6877	Male	8y1m	No	No	No	No	No	No	No	No	No	0.33	No
08-6879	Female	6y11m	No	Yes	Yes	Yes	No	No	No	No	No	-0.12	No
08-6880	Male	4y	No	No	Yes	No	No	No	No	No	No	0.69	No
08-6881	Male	13y2m	Yes	No	No	No	No	No	No	No	No	0.55	No
08-6882	Female	7y	No	No	Yes	No	No	No	No	No	No	-0.13	No
08-6889	Male	4y5m	No	No	Yes	No	No	No	No	No	No	1.67	No
08-6890	Female	7y	No	No	No	No	No	No	No	No	No	0.52	Yes
08-6892	Male	4y1m	Yes	No	No	No	No	No	No	No	No	0.56	No
08-6893	Male	10y7m	Yes	No	No	No	No	No	No	No	No	45.17	No
08-6897	Male	7y	Yes	Yes	Yes	No	No	No	No	No	No	0.31	No
08-6898	Female	4y1m	Yes	Yes	Yes	No	No	No	No	Yes	No	49.83	No
08-6900	Female	4y1m	Yes	No	No	No	No	No	No	No	No	0.89	No
08-6901	Male	3y4m	No	No	No	No	No	No	No	No	No	2	No
08-6902	Male	3y8m	No	No	No	No	No	No	No	Yes	No	2.43	No
08-6903	Male	4y1m	Yes	No	Yes	No	No	No	No	Yes	No	0.27	Yes
08-6904	Female	5y11m	No	No	No	No	No	No	No	No	No	1.05	Yes
08-6905	Male	4y3m	Yes	No	No	No	No	No	No	No	No	1.12	Yes
08-6907	Male	7y5m	Yes	No	No	No	No	No	No	No	No	1.25	No
08-6909	Female	5y9m	No	No	No	No	No	No	No	No	No	-0.89	Yes
08-6910	Male	12y1m	No	No	No	No	No	No	No	No	No	-1.29	Yes
08-6911	Male	8y7m	Yes	No	No	No	No	No	No	No	No	0.3	No
08-6913	Male	8y10m	No	No	No	No	No	No	No	No	No	1.11	No
08-6915	Male	4y11m	Yes	No	No	No	No	No	No	No	No	1.12	No
08-6916	Male	10y10m	Yes	No	Yes	No	No	No	No	No	No	0.67	No
08-6917	Male	8y7m	Yes	No	Yes	No	No	No	No	No	No	0.79	No
08-6918	Female	5y7m	Yes	Yes	Yes	No	No	No	No	No	No	1.29	No
08-6919	Female	12y9m	No	No	Yes	No	No	No	No	No	No	27.58	No
08-6920	Male	5y8m	Yes	Yes	No	No	No	No	No	No	No	-0.79	No
08-6921	Male	9y1m	Yes	No	Yes	No	No	No	No	No	No	0.4	No
08-6922	Female	6y11m	Yes	No	No	No	No	No	No	No	No	-1.69	No
08-6923	Female	8y11m	Yes	No	Yes	No	No	No	No	No	No	-0.32	No
08-6924	Male	3y6m	Yes	No	No	No	No	No	No	No	No	2.52	No
08-6927	Male	11y9m	Yes	No	No	No	No	No	No	No	No	0.32	No
08-6928	Male	9y3m	Yes	Yes	Yes	No	No	No	No	No	No	0.86	No
08-6931	Female	14y8m	Yes	No	Yes	No	No	No	No	No	No	0.97	No
08-6932	Female	6y11m	No	No	No	No	No	No	No	No	No	0.87	Yes
08-6933	Female	4y5m	Yes	Yes	Yes	No	No	No	No	No	No	80.49	No
08-6934	Female	5y5m	No	No	No	No	No	No	Yes	Yes	No	0.69	Yes
08-6935	Female	6y9m	No	No	No	No	No	No	No	No	No	1.52	Yes
08-6936	Male	10y3m	Yes	No	No	No	No	No	No	No	No	-1.22	No
08-6939	Male	4y5m	Yes	No	No	No	No	No	No	No	No	1.12	No
08-6940	Male	10y8m	No	No	No	No	No	No	No	No	No	19.44	Yes
08-6942	Male	10y11m	Yes	No	Yes	No	No	No	No	No	No	36.08	Yes
08-6943	Female	5y9m	Yes	Yes	Yes	No	No	No	No	No	No	-16.97	No
08-6945	Male	4y10m	Yes	No	No	No	No	No	No	No	No	1.77	No
08-6946	Female	4y7m	Yes	Yes	No	No	No	No	No	No	No	2.64	No
08-6948	Female	9y	Yes	Yes	No	No	No	No	No	No	No	7.32	No
08-6950	Male	3y5m	No	No	Yes	No	No	No	No	Yes	No	1.51	No
08-6951	Male	6y8m	No	No	Yes	No	No	Yes	No	No	No	1.71	No
08-6952	Female	10y4m	Yes	No	Yes	No	No	No	No	No	No	3.11	No
08-6956	Female	7y4m	Yes	No	No	No	No	No	No	No	No	0.52	No
09-6958	Male	13y5m	Yes	No	No	No	No	No	No	No	No	42.91	No
09-6959	Male	10y1m	No	Yes	No	Yes	No	No	No	No	No	60.19	No
09-6961	Female	4y4m	No	No	Yes	No	No	No	No	No	No	3.76	No
09-6964	Male	8y6m	No	No	No	No	No	No	No	Yes	No	-1.47	No
09-6966	Female	7y4m	No	No	No	No	No	No	No	No	No	34.49	Yes
09-6968	Female	8y1m	Yes	Yes	No	No	No	No	No	No	No	0.26	No
09-6973	Female	7y5	No	No	No	No	Yes	No	No	No	No	0.1	No
09-6974	Female	10y2	Yes	Yes	Yes	No	No	No	No	No	No	-0.2	No
09-6975	Female	3y3	No	No	No	No	No	No	No	No	No	4.66	Yes
09-6976	Male	3y7	Yes	No	Yes	No	No	No	No	No	No	2.33	No
09-6977	Female	3y2	Yes	No	No	Yes	No	No	No	No	No	1.44	No
09-6979	Male	4y10	Yes	Yes	Yes	No	No	No	No	No	No	-0.4	No
09-6980	Female	5y3	Yes	Yes	No	No	No	No	No	No	No	1.06	No
09-6982	Male	4y9	Yes	No	No	No	No	No	No	No	No	0.86	No
09-6984	Female	9y2	No	No	Yes	No	No	No	No	No	No	1.14	No
09-6985	Male	4y7m	No	No	No	No	No	No	No	No	No	0.47	Yes
09-6987	Male	12y11	No	Yes	No	No	No	No	No	No	No	1.56	No
09-6990	Male	5y10	Yes	Yes	Yes	No	No	No	No	No	No	2.73	No
09-6994	Male	8y7	Yes	No	No	No	No	No	No	No	No	0.26	No
09-6995	Male	7y5	Yes	Yes	Yes	No	No	No	No	No	No	47.07	No
09-6996	Male	9y3	No	Yes	No	No	No	No	No	No	No	16.09	No
09-6998	Female	5y	Yes	Yes	No	No	No	No	No	No	No	1.17	No
09-7000	Male	9y8	No	Yes	No	No	No	Yes	No	No	No	-2.24	No
09-7001	Female	9y10	Yes	No	No	No	No	No	No	No	No	26.33	No
09-7002	Female	8y2	No	No	No	No	No	No	No	No	No	0.56	Yes
09-7003	Female	7y10	Yes	No	No	No	No	No	No	Yes	No	0.95	No
09-7004	Female	9y2	Yes	Yes	No	No	No	No	No	No	No	4.49	No
09-7005	Female	9y11	Yes	No	Yes	No	No	No	No	No	No	5.87	No
09-7006	Male	7y1m	Yes	No	Yes	No	No	No	No	No	No	2.13	No
09-7007	Male	9y2	Yes	No	Yes	No	No	No	No	No	No	3.13	No
09-7008	Female	7y2	No	No	No	No	No	No	No	No	No	0.77	Yes
09-7010	Female	13y11	No	No	No	No	No	No	No	No	No	53.92	Yes
09-7011	Male	12y7	Yes	Yes	No	No	No	No	No	No	No	0.65	No
09-7012	Male	11y5	Yes	No	No	No	No	No	No	No	No	6.96	No
09-7014	Male	8y4	Yes	Yes	No	No	No	No	No	No	No	-0.24	No
09-7015	Female	5y	Yes	No	No	No	No	No	No	Yes	No	0.58	No
09-7016	Male	6y3	Yes	Yes	No	No	No	No	Yes	No	No	0.96	No
09-7017	Female	10y6	No	No	No	No	No	No	No	Yes	No	4.84	No
09-7018	Male	10y9	Yes	No	Yes	No	No	No	No	No	No	0.52	No
09-7021	Male	9y9	No	No	Yes	No	No	No	No	No	No	0.61	No
09-7025	Male	12y8	Yes	Yes	Yes	No	Yes	No	No	Yes	No	0.38	No
09-7026	Female	12y4	No	No	No	No	No	No	No	No	No	-0.1	Yes
09-7027	Male	6y10	Yes	No	Yes	No	Yes	No	No	No	No	0.06	No
09-7028	Male	12y8	Yes	No	Yes	No	No	No	No	No	No	23.06	No
09-7029	Female	13y5	Yes	No	Yes	No	No	No	No	No	No	1.06	No
09-7030	Female	10y11	Yes	No	Yes	No	No	No	No	No	No	53.01	No
09-7031	Male	5y2	No	Yes	No	No	No	No	No	No	No	1.49	Yes
09-7032	Male	5y4	Yes	No	No	No	No	No	No	No	No	0.62	No
09-7033	Male	8y3	Yes	No	Yes	No	No	No	No	No	No	15.47	No
09-7035	Male	13y2	No	Yes	No	Yes	No	No	No	No	No	-0.19	No
09-7036	Male	10y10	Yes	Yes	No	No	No	No	Yes	No	No	-0.15	No
09-7037	Male	7y9	Yes	No	Yes	No	No	No	No	No	No	54.85	No
09-7042	Male	10y6	No	No	No	No	No	No	No	No	No	0.31	Yes
09-7043	Female	6y5	No	No	No	No	No	No	No	No	No	0.4	No
09-7044	Female	12y8	Yes	No	No	No	No	Yes	Yes	No	No	-0.21	No
09-7046	Male	6y4	No	No	Yes	No	No	No	No	No	No	-0.47	No
09-7047	Male	8y7	Yes	No	Yes	No	No	No	No	No	No	1.35	No
09-7053	Female	7y8	No	No	No	No	No	No	No	No	No	0.16	Yes
09-7054	Male	7y	No	No	Yes	No	No	No	No	No	No	26.37	No
09-7061	Male	15y10	No	No	No	No	No	No	No	No	No	25.82	No
09-7062	Female	8y8	Yes	No	No	No	No	No	No	No	No	1.14	No
09-7064	Female	9y1	Yes	No	No	No	No	No	No	No	No	0.78	No
09-7066	Female	12y11	Yes	No	No	No	No	No	No	No	No	-0.44	No
09-7067	Female	5y5	Yes	Yes	No	No	No	No	No	No	No	2.16	Yes
09-7068	Female	6y5	No	Yes	Yes	No	No	No	No	No	No	1.72	No
09-7069	Male	8y8	Yes	No	Yes	No	No	No	No	No	No	0.25	No
09-7071	Male	10y1	Yes	No	No	No	No	No	No	No	No	0.72	Yes
09-7072	Female	9y10	Yes	No	No	No	No	No	No	No	No	23.08	No
09-7078	Male	11y1	No	No	No	No	No	No	No	No	No	0.21	No
09-7082	Female	5y7	Yes	No	Yes	No	No	No	No	No	No	-0.2	No
09-7083	Male	5y3	Yes	No	No	No	No	No	No	No	No	0.58	No
09-7084	Male	4y9	No	No	No	No	No	No	No	No	No	1.16	No
09-7085	Male	12y6	Yes	No	Yes	Yes	No	No	No	No	No	0.84	No
09-7086	Female	10y4	Yes	No	Yes	No	No	No	No	No	No	38.67	No
09-7089	Female	12y1	No	No	Yes	No	No	No	No	No	No	0.28	No
09-7091	Female	7y2	Yes	Yes	No	No	No	No	No	No	No	0.6	No
09-7098	Female	5y1	Yes	Yes	Yes	No	No	No	No	No	No	1.48	No
09-7102	Female	8y1	Yes	No	No	No	No	No	No	No	No	0.51	No
09-7105	Male	11y1	Yes	Yes	Yes	No	No	No	No	No	No	0.27	No
09-7106	Male	5y11	Yes	No	No	No	No	No	No	No	No	0.37	No
09-7107	Male	4y4	Yes	No	No	No	No	No	No	No	No	0.61	No
09-7110	Male	9y11	Yes	No	No	No	No	No	No	No	No	0.77	No
09-7114	Male	11y8	Yes	No	No	No	No	No	No	No	No	0.56	No
09-7115	Male	6y4	Yes	No	Yes	No	No	No	No	No	No	57.16	No
09-7116	Male	9y7	Yes	No	No	No	No	No	No	No	No	0.18	No
09-7117	Female	6y3	Yes	No	No	No	No	No	No	No	No	0.95	No
09-7120	Male	5y10	No	No	No	No	No	No	No	No	No	0.59	Yes
09-7122	Male	14y6	No	No	No	No	No	No	No	No	No	-0.3	Yes
09-7123	Female	4y7	Yes	No	Yes	No	No	No	No	No	No	0.43	No
09-7125	Male	9y11	Yes	No	Yes	No	No	No	No	No	No	-0.2	No
09-7126	Female	7y8	Yes	No	No	No	No	No	No	No	No	0.34	No
09-7127	Female	6y5	Yes	No	No	No	No	No	No	No	No	0.92	No
09-7134	Male	8y1	Yes	No	No	No	No	No	No	No	No	2.57	No
09-7135	Female	12y4	No	No	Yes	No	No	No	No	No	No	27.65	No
09-7141	Male	3y9	Yes	Yes	Yes	No	No	No	No	No	No	-0.26	No
09-7143	Male	7y2	Yes	No	No	No	No	No	No	No	No	1.01	No
09-7144	Female	11y3	Yes	No	Yes	No	No	No	No	No	No	0.03	No
09-7147	Female	4y4	No	No	No	No	No	No	No	Yes	No	1.76	Yes
09-7148	Male	10y1m	Yes	No	Yes	No	No	No	No	No	No	0.14	No
09-7149	Male	7y2	Yes	No	No	No	No	No	No	No	No	37.59	No
09-7150	Female	14y2	Yes	No	Yes	No	No	No	No	No	No	0.46	No
09-7151	Male	8y3	Yes	Yes	No	No	No	No	No	No	No	0	No
09-7152	Male	7y2	Yes	No	No	No	No	No	No	No	No	0.4	No
09-7153	Male	3y9	Yes	No	No	No	No	No	No	No	No	0.1	No
09-7154	Male	7y3	Yes	No	No	No	No	No	No	No	No	-0.33	No
09-7156	Male	9y7	Yes	Yes	Yes	No	No	No	No	No	No	0.75	No
09-7160	Female	6y1m	Yes	No	No	No	No	No	No	No	No	-0.65	No
09-7163	Female	9y2	Yes	Yes	No	No	No	No	No	No	No	-0.17	No
09-7164	Male	9y3	Yes	No	No	No	No	No	No	No	No	0.31	No
09-7165	Female	12y3	No	No	No	No	No	No	No	Yes	No	-0.41	No
09-7169	Female	13y3	No	No	No	Yes	No	No	No	No	No	-0.11	No
09-7173	Female	7y6	Yes	No	No	No	No	No	No	No	No	-0.22	No
09-7174	Male	6y7	No	No	No	No	No	No	No	No	No	0.82	Yes
09-7176	Male	5y9	No	No	No	No	No	No	No	No	No	-0.39	No
09-7177	Female	9y5	Yes	No	No	No	No	No	No	No	No	1.42	No
09-7178	Male	8y6	Yes	No	No	No	No	No	No	No	No	0.97	No
09-7182	Male	6y5	Yes	No	No	No	No	No	No	No	No	2.01	No
09-7183	Female	10y1	Yes	Yes	Yes	No	No	No	No	No	No	0.03	No
09-7185	Male	10y2	Yes	No	No	No	No	No	No	No	No	0.74	No
09-7191	Female	7y9	Yes	No	No	No	No	No	No	No	No	0.16	No
09-7192	Female	4y2	No	Yes	No	No	No	No	No	No	No	-1.61	No
09-7193	Female	6y1	Yes	No	No	No	No	No	No	No	No	5.3	No
09-7194	Male	4y7	Yes	No	No	No	No	No	No	No	No	-0.23	No
09-7199	Female	11y9	Yes	Yes	Yes	No	No	No	No	No	No	22.53	No
09-7200	Female	4y8	Yes	Yes	Yes	No	No	No	No	No	No	0.64	No
09-7201	Female	5y6	No	No	Yes	No	No	No	No	No	No	-0.3	No
09-7202	Female	4y10	No	No	Yes	No	No	No	No	No	No	1.52	No
09-7205	Female	5y2	Yes	No	No	No	No	No	Yes	No	No	0.62	No
09-7207	Female	4y6	Yes	Yes	Yes	No	No	No	No	No	No	-0.3	No
09-7208	Male	8y8	No	No	No	No	No	No	No	No	Yes	1.21	No
09-7209	Male	5y11	Yes	Yes	No	No	No	No	No	No	No	2.69	No
09-7210	Male	8y8	No	No	No	No	No	No	No	Yes	No	0.52	No
09-7212	Female	12y1	Yes	No	Yes	No	No	No	No	No	No	0.22	No
09-7213	Male	3y4	No	No	Yes	No	No	No	No	Yes	No	1.15	No
09-7215	Female	11y1	No	No	Yes	No	No	No	No	No	No	0.15	No
09-7220	Female	6y8	Yes	Yes	No	No	No	No	No	No	No	0.77	No
09-7228	Female	5y7	Yes	Yes	No	No	No	No	No	No	No	0.42	No
09-7229	Female	10y4	Yes	No	No	No	No	No	No	No	No	0.45	No
09-7230	Male	6y2	No	No	No	No	No	No	No	No	No	0.66	Yes
09-7236	Female	12y	No	No	No	No	No	No	No	Yes	No	0	No
09-7237	Male	9y7	No	No	Yes	No	No	No	No	No	No	0.63	No
09-7238	Female	8y2	Yes	No	No	No	No	No	No	No	No	60.39	No
09-7241	Female	6y4	Yes	Yes	No	No	No	No	No	No	No	0.64	No
09-7243	Male	4y4	Yes	Yes	No	No	No	No	No	No	No	0.35	No
09-7244	Male	10y4	Yes	No	No	No	No	No	No	No	No	0.64	No
09-7245	Male	9y3	Yes	Yes	Yes	No	No	No	No	No	No	0.46	No
09-7263	Female	7y3	No	No	No	No	No	No	No	No	No	0.84	No
09-7264	Male	7y10	No	No	No	No	No	No	No	No	No	0.25	No
09-7265	Male	10y4	Yes	No	Yes	No	No	No	No	No	No	17.76	No
09-7266	Male	11y8	Yes	No	No	No	No	No	No	No	No	26.4	No
09-7267	Male	9y3	Yes	No	Yes	No	No	No	No	No	No	1.1	No
09-7268	Male	7y2	No	Yes	No	No	No	No	No	No	No	0.21	No
09-7269	Male	5y5	No	No	Yes	No	No	No	No	No	No	-0.11	No
09-7273	Female	7y1m	Yes	No	Yes	No	No	No	No	No	No	0.98	No
09-7277	Female	5y1m	No	Yes	Yes	No	No	No	No	No	No	2.19	No
09-7279	Female	3y9	Yes	No	No	No	No	No	No	No	No	1.39	No
09-7280	Male	7y2	Yes	No	No	No	No	No	No	No	No	0.17	No
09-7281	Male	9y	Yes	No	Yes	No	No	No	No	No	No	-0.15	No
09-7282	Female	10y3	Yes	No	No	No	No	No	No	No	No	0.04	No
09-7283	Female	8y11	Yes	No	Yes	No	No	No	No	No	No	0	No
09-7284	Female	7y6	No	Yes	No	No	No	No	No	No	No	0.66	No
09-7285	Female	7y5	Yes	Yes	No	No	No	No	No	No	No	1.91	No
09-7286	Female	5y4	Yes	No	Yes	No	No	No	No	No	No	1.14	No
09-7287	Female	3y10	No	Yes	Yes	No	No	No	No	No	No	0.46	No
09-7288	Female	10y1m	No	No	Yes	Yes	No	No	No	No	No	44.13	No
09-7290	Female	8y2	Yes	No	No	No	No	No	No	No	No	58.62	No
09-7292	Female	9y7	No	Yes	No	No	No	No	No	No	No	0.47	No
09-7296	Male	5y3	No	Yes	No	No	No	No	No	Yes	No	0.46	No
09-7297	Female	5y10	No	No	Yes	No	No	No	No	No	No	1.12	No
09-7298	Female	6y3	No	No	No	No	No	No	No	No	No	0.18	No
09-7307	Male	4y2	Yes	No	No	No	No	No	No	No	No	0.67	No
09-7308	Female	12y2	Yes	No	No	No	No	No	No	Yes	No	0.87	No
09-7312	Male	6y3	Yes	Yes	No	No	No	No	No	No	No	65.93	No
09-7313	Male	3y9	Yes	No	No	No	No	No	No	No	No	-0.39	No
09-7317	Male	4y2	Yes	No	No	No	No	No	No	No	No	1.95	No
09-7318	Male	8y5	Yes	No	No	No	No	No	No	No	No	1.14	No
09-7319	Male	4y3	Yes	No	No	No	No	No	No	No	No	33.77	No
09-7320	Male	4y6	No	No	Yes	Yes	No	No	No	No	No	63.83	No
09-7323	Female	5y2	Yes	No	Yes	No	No	No	No	No	No	1.05	No
09-7332	Male	7y3	Yes	Yes	Yes	No	No	No	No	No	No	0.23	No
09-7333	Female	6y7	Yes	No	No	No	No	No	No	Yes	No	0.63	No
09-7334	Female	5y7	Yes	No	No	No	No	No	No	No	No	0.73	No
09-7335	Male	7y2	No	Yes	No	No	No	No	No	Yes	No	33.66	No
09-7336	Male	3y1	No	No	Yes	Yes	No	No	No	No	No	38.64	No
09-7337	Male	5y11	Yes	No	No	No	No	No	No	No	No	-0.57	No
09-7339	Female	9y5	Yes	No	No	No	No	No	No	No	No	38.56	No
09-7341	Male	9y8	Yes	No	No	No	No	No	No	No	No	0.86	No
09-7342	Male	7y4	Yes	No	No	No	No	No	No	No	No	1.52	No
09-7344	Male	10y8	No	No	No	No	No	No	No	No	No	-0.27	No
09-7360	Male	5y6	Yes	No	Yes	No	No	No	No	No	No	0.19	No
09-7362	Female	6y5	No	No	No	No	No	No	No	No	No	0.67	No
09-7363	Male	5y	Yes	No	No	No	No	No	No	No	No	0.54	No
09-7367	Female	8y7	Yes	No	No	No	No	No	No	No	No	1.7	No
09-7371	Male	8y11	Yes	No	No	No	No	No	No	No	No	56.57	No
09-7386	Female	9y7	Yes	No	No	No	Yes	No	No	No	No	1.03	No
09-7387	Female	5y4	Yes	No	No	No	No	No	No	No	No	0.59	No
09-7388	Female	6y5	Yes	No	No	No	No	No	No	No	No	0.93	No
09-7390	Female	5y	Yes	No	No	No	No	No	No	No	No	1.54	No
09-7391	Female	6y11	Yes	No	No	No	No	No	No	No	No	0.26	No
09-7393	Female	5y6	Yes	No	No	No	No	No	No	No	No	0.35	No
09-7395	Male	6y7	Yes	No	Yes	No	No	No	No	No	No	0.52	No
09-7396	Female	5y4	Yes	No	No	No	No	No	No	No	No	1.3	No
09-7397	Male	10y1	Yes	No	No	No	No	No	No	No	No	20.87	No
09-7401	Female	7y5	Yes	No	No	No	No	No	No	No	No	1.89	No
09-7407	Female	8y8	Yes	No	No	No	No	No	No	No	No	80.84	No
09-7412	Male	8y	Yes	No	No	No	No	No	No	No	No	1.21	No
09-7414	Female	9y7	Yes	No	No	No	No	No	No	No	No	1.38	No
09-7415	Male	7y4	No	No	No	No	Yes	No	No	No	No	1.12	No
09-7416	Female	8y2	Yes	No	No	No	No	No	No	No	No	0.57	No
09-7417	Male	7y	Yes	No	No	No	No	No	No	No	No	0.15	No
09-7418	Male	8y7	Yes	No	No	No	No	No	No	No	No	0.6	No
09-7421	Male	8y1	Yes	No	No	No	No	No	No	No	No	0.41	No
09-7422	Male	4y7	Yes	No	No	No	No	No	No	No	No	0.12	No
09-7429	Male	9y9	Yes	No	Yes	No	No	No	No	No	No	5.88	No
09-7433	Female	5y	Yes	No	No	No	No	No	No	No	No	1.63	No
09-7434	Male	5y9	Yes	No	No	No	No	No	No	No	No	1.04	No
09-7435	Female	4y9	Yes	No	No	No	No	No	No	No	No	0.81	No
[truncated: 10,798 more rows]
